# Supplementary material for: Homing-based gene drives can introgress rapidly into local genetic backgrounds with minimal chromosomal conversion in Anopheles gambiae
Source: Research Square preprint supplement (doi:10.21203/rs.3.rs-3675767/v1), 2023-12-01
Supplement: Supplementary file 1 [file b4e95e50e19df92acf2eaafb.xlsx]

## Sheet: Table S5 Haplotype sequences
Sample	Haplotype	Gene drive locus	% of total reads	Sequence
A_left	A_left_1	AGAP007280	46.5171	GACCGTTTGTGTGTCAGAGCAAGTCGAACCCGTTCGAGTGGTATCTGGCCGGTGTGGTAAGTCACGGAGAGGGATGTGCGCGTGCACACGAACCCGGTGTCTACACGCGAGTGGCACTGTTTATCGATTGGATTGCGGAGAAGGTAAATGCGCCACTGCCAGTACGTACTGCACGGGCTGACTGTCCCGGGATGCGATGTATCTGGGGTGGAGGGATCTGTCTACCACCGGGCAAGAAGTGTAACGGATATGTTAACTGTCTTGGTGGGGAGGATGAGTCGGGCTGTGGGATGGATCAGATGCTACGATCGATGTCGCAGCGAGGCGAGGAAGAAACAACTTTATTATACAAAGTTGTGGCGCGCCCCCCAACTGGGGTAACCTTTGGGCTCCCCGGGC…
A_left	A_left_2	AGAP007280	10.408	GACCGTTTGTGTGTCAGAGCAAATCGAACCCGTTCGAGTGGTATCTGGCCGGTGTGGTAAGTCACGGGGAGGGATGTGCGCGTGCACACGAACCCGGTGTCTACACGCGAGTGGCACTGTTTATCGATTGGATTGCGGAGAAGGTAAATGCGCCACTGCCAGTACGTACTGCACGGGCTGACTGTCCCGGGATGCGATGTATCTGGGGTGGAGGGATCTGTCTACCACCGGGCAAGAAGTGTAACGGATATGTTAACTGTCTTGGTGGGGAGGATGAGTCGGGCTGTGGGATGGATCAGATGCTACGATCGATGTCGCAGCGAGGCGAGGAAGAAACAACTTTATTATACAAAGTTGTGGCGCGCCCCCCAACTGGGGTAACCTTTGGGCTCCCCGGGC…
A_left	A_left_3	AGAP007280	1.98614	GACCGTTTGTGTGTCAGAGCAAATCGAACCCGTTCGAGTGGTATCTGGCCGGTGTGGTAAGTCACGGGGAGGGATGTGCGCGTGCACACGAACCCGGTGTCTACACGCGAGTGGCACTGTTTATCGATTGGATTGCGGAGAAGGTAAATGCGCCACTGCCAGTACGTACTGCACGGGCTGACTGTCCCGGGATGCGATGTATCTGGGGTGGAGGGATCTGTCTACCACCGGGCAAGAAGTGTAACGGATACGTTAACTGTCTTGGTGGGGAGGATGAGTCGGGCTGTGGGATGGATCAGATGCTACGATCGATGTCGCAGCGAGGCGAGGAAGAAACAACTTTATTATACAAAGTTGTGGCGCGCCCCCCAACTGGGGTAACCTTTGGGCTCCCCGGGC…
A_left	A_left_4	AGAP007280	0.99307	GACCGTTTGTGTGTCAGAGCAAATCGAACCCGTTCGAGTGGTATCTGGCCGGTGTGGTAAGTCACGGAGAGGGATGTGCGCGTGCACACGAACCCGGTGTCTACACGCGAGTGGCACTGTTTATCGATTGGATTGCGGAGAAGGTAAATGCGCCACTGCCAGTACGTACTGCACGGGCTGACTGTCCCGGGATGCGATGTATCTGGGGTGGAGGGATCTGTCTACCACCGGGCAAGAAGTGTAACGGATATGTTAACTGTCTTGGTGGGGAGGATGAGTCGGGCTGTGGGATGGATCAGATGCTACGATCGATGTCGCAGCGAGGCGAGGAAGAAACAACTTTATTATACAAAGTTGTGGCGCGCCCCCCAACTGGGGTAACCTTTGGGCTCCCCGGGC…
A_left	A_left_5	AGAP007280	0.826723	GACCGTTTGTGTGTCAGAGCAAGTCGAACCCGTTCGAGTGGTATCTGGCCGGTGTGGTAAGTCACGGGGAGGGATGTGCGCGTGCACACGAACCCGGTGTCTACACGCGAGTGGCACTGTTTATCGATTGGATTGCGGAGAAGGTAAATGCGCCACTGCCAGTACGTACTGCACGGGCTGACTGTCCCGGGATGCGATGTATCTGGGGTGGAGGGATCTGTCTACCACCGGGCAAGAAGTGTAACGGATATGTTAACTGTCTTGGTGGGGAGGATGAGTCGGGCTGTGGGATGGATCAGATGCTACGATCGATGTCGCAGCGAGGCGAGGAAGAAACAACTTTATTATACAAAGTTGTGGCGCGCCCCCCAACTGGGGTAACCTTTGGGCTCCCCGGGC…
A_left	A_left_6	AGAP007280	0.668734	GACCGTTTGTGTGTCAGAGCAAATCGAACCCGTTCGAGTGGTATCTGGCCGGTGTGGTAAGTCACGGGGAGGGATGTGCGCGTGCACACGAACCCGGTGTCTACACGCGAGTGGCACTGTTTATCGATTGGATTGCGGAGAAGGTAAATGCGCCACTGCCAGTACGTACTGCACGGGCTGACTGTCCCGGGATGCGATGTATCTGGGGTGGAGGGATCTGTCTACCACCGGGCAAGAAGTGTAACGGATACGTTAACTGTCTTGGTGGGGAGGATGAGTCGGGCTGTGGGATGGATCAGATGCTACGATCGATGTCGCAGCGAGGTGAGGAAGAAACAACTTTATTATACAAAGTTGTGGCGCGCCCCCCAACTGGGGTAACCTTTGGGCTCCCCGGGC…
A_left	A_left_7	AGAP007280	0.600189	GACCGTTTGTGTGTCAGAGCAAGTCGAACCCGTTCGAGTGGTATCTGGCCGGTGTGGTAAGTCACGGAGAGGGATGTGCGCGTGCACACGAACCCGGTGTCTACACGCGAGTGGCACTGTTTATCGATTGGATTGCGGAGAAGGTAAATGCGCCACTGCCAGTACGTACTGCACGGGCTGACTGTCCCGGGATGCGATGTATCTGGGGTGGAGGGATCTGTCTACCACCGGGCAAGAAGTGTAACGGATACGTTAACTGTCTTGGTGGGGAGGATGAGTCGGGCTGTGGGATGGATCAGATGCTACGATCGATGTCGCAGCGAGGCGAGGAAGAAACAACTTTATTATACAAAGTTGTGGCGCGCCCCCCAACTGGGGTAACCTTTGGGCTCCCCGGGC…
A_right	A_right_1	AGAP007280	23.34	CAACTTGAAAAAGTGGCACCGAGTCGGTGCTTTTTTTTACGCGTGGGTCCCATGGGTGAGGTGGAGTACGCGCCCGGGGAGCCCAAAGGTTACCCCAGTTGGGGGGCGCGCCCAACTTTGTATAGAAAAGTTGGGTGAGTGAGGAGGAGGGTGGTAGTGCCACACAGAGAGCTTCGGATGTTGATACAACGGAAGCTGAGACTACCGTGTTGTTCACATCGGAAGAAACGACGACGTTAAGCGTGCCGGAAGAAGCGAGTGTAGAAGCGCAGGAGAGTATGATCATGACGAACACAGCACAAACGGAACCGATCACTACTACTACAAGTACAGTTGCCACTACCACACCTCAACTTGAGCTATCTACTGCTGAAGAAAGCACAACGGAGGACAGCTCTA…
A_right	A_right_2	AGAP007280	10.6757	CAACTTGAAAAAGTGGCACCGAGTCGGTGCTTTTTTTTACGCGTGGGTCCCATGGGTGAGGTGGAGTACGCGCCCGGGGAGCCCAAAGGTTACCCCAGTTGGGGGGCGCGCCCAACTTTGTATAGAAAAGTTGGGTGAGTGAGGAGGAGGGTGGTAGTGCCACACAGAGAGCTTCGGATGTGGATACGACGGAAGCTGAGACTACGGTTTTGTTCACATCGGAAGAAACGACGACGTTAAGCGTGCCGGAAGAAGCGAGTGTAGAAGCGCAGGAGAGTATGATCATGACGAACACAGCACAGACGGAACCGATCACTACTACTACAAGTACAGCTGCCCCTACCACACCTCAGCTTGAGCTATCTACTGCAGAAGAAAGCACAACGGAAGATAGCTCTA…
A_right	A_right_3	AGAP007280	8.74263	CAACTTGAAAAAGTGGCACCGAGTCGGTGCTTTTTTTTACGCGTGGGTCCCATGGGTGAGGTGGAGTACGCGCCCGGGGAGCCCAAAGGTTACCCCAGTTGGGGGGCGCGCCCAACTTTGTATAGAAAAGTTGGGTGAGTGAGGAGGAGGGTGGTAGTGCCACACAGAGAGCTTCGGATGTGGATACGACGGAAGCTGAGACTACCGTGTTGTTCACATCGGAAGAAACGACGACGTTAAGCGTGCCGGAAGAAGCGAGTGTAGAAGCGCAGGAGAGTATGATCATGACGAACACAGCACAAACGGAACCGATCACTACTACTACAAGTACAGTTGCCACTACCACACCTCAACTTGAGCTATCTACTGCTGAAGAAAGCACAACGGAGGACAGCTCTA…
A_right	A_right_5	AGAP007280	5.7087	CAACTTGAAAAAGTGGCACCGAGTCGGTGCTTTTTTTTACGCGTGGGTCCCATGGGTGAGGTGGAGTACGCGCCCGGGGAGCCCAAAGGTTACCCCAGTTGGGGGGCGCGCCCAACTTTGTATAGAAAAGTTGGGTGAGTGAGGAGGAGGGTGGTAGTGCCACACAGAGAGCTTCGGATGTGGATACGACGGAAGCTGAGACTACGGTTTTGTTCACATCGGAAGAAACGACGACGTTAAGCGTGCCGGAAGAAGCGAGTGTAGAAGCGCAGGAGAGTATGATCATGACGAACACAGCACAAACGGAACCGATCACTACTACTACAAGTACAGTTGCCACTACCACACCTCAACTTGAGCTATCTACTGCTGAAGAAAGCACAACGGAGGACAGCTCTA…
A_right	A_right_6	AGAP007280	5.38165	CAACTTGAAAAAGTGGCACCGAGTCGGTGCTTTTTTTTACGCGTGGGTCCCATGGGTGAGGTGGAGTACGCGCCCGGGGAGCCCAAAGGTTACCCCAGTTGGGGGGCGCGCCCAACTTTGTATAGAAAAGTTGGGTGAGTGAGGAGGAGGGTGGTAGTGCCACACAGAGAGCTTCGGATGTGGATACGACGGAAGCTGAGACTACGGTTTTGTTCACATCGGAAGAAACGACGACGTTAAGCGTGCCGGAAGAAGCGAGTGTAGAAGCGCAGGAGAGTATGATCATGACGAACACAGCACAGACGGAACCGATCACTACTACTACAAGTACAGCTGCCCCTACCACACCTCAGCTTGAGCTATCTACTGCAGAAGAAAGCACAACGGAGGACAGCTCTA…
B_left	B_left_1	AGAP007280	37.4614	GACCGTTTGTGTGTCAGAGCAAGTCGAACCCGTTCGAGTGGTATCTGGCCGGTGTGGTAAGTCACGGAGAGGGATGTGCGCGTGCACACGAACCCGGTGTCTACACGCGAGTGGCACTGTTTATCGATTGGATTGCGGAGAAGGTAAATGCGCCACTGCCAGTACGTACTGCACGGGCTGACTGTCCCGGGATGCGATGTATCTGGGGTGGAGGGATCTGTCTACCACCGGGCAAGAAGTGTAACGGATACGTTAACTGTCTTGGTGGTGAGGATGAGTCGGGCTGTGGGATGGATCAGATGCTACGATCGATGTCGCAGCGAGGTGAGGAAGAAACAACTTTATTATACAAAGTTGTGGCGCGCCCCCCAACTGGGGTAACCTTTGGGCTCCCCGGGC…
B_left	B_left_2	AGAP007280	9.11213	GACCGTTTGTGTGTCAGAGCAAATCGAACCCGTTCGAGTGGTATCTGGCCGGTGTGGTAAGTCACGGGGAGGGATGTGCGCGTGCACACGAACCCGGTGTCTACACGCGAGTGGCACTGTTTATCGATTGGATTGCGGAGAAGGTAAATGCGCCACTGCCAGTACGTACTGCACGGGCTGACTGTCCCGGGATGCGATGTATCTGGGGTGGAGGGATCTGTCTACCACCGGGCAAGAAGTGTAACGGATACGTTAACTGTCTTGGTGGTGAGGATGAGTCGGGCTGTGGGATGGATCAGATGCTACGATCGATGTCGCAGCGAGGTGAGGAAGAAACAACTTTATTATACAAAGTTGTGGCGCGCCCCCCAACTGGGGTAACCTTTGGGCTCCCCGGGC…
B_left	B_left_3	AGAP007280	7.88114	GACCGTTTGTGTGTCAGAGCAAATCGAACCCGTTCGAGTGGTATCTGGCCGGTGTGGTAAGTCACGGGGAGGGATGTGCGCGTGCACACGAACCCGGTGTCTACACGCGAGTGGCACTGTTTATCGATTGGATTGCGGAGAAGGTAAATGCGCCACTGCCAGTACGTACTGCACGGGCTGACTGTCCCGGGATGCGATGTATCTGGGGTGGAGGGATCTGTCTACCACCGGGCAAGAAGTGTAACGGATACGTTAACTGTCTTGGTGGGGAGGATGAGTCGGGCTGTGGGATGGATCAGATGCTACGATCGATGTCGCAGCGAGGTGAGGAAGAAACAACTTTATTATACAAAGTTGTGGCGCGCCCCCCAACTGGGGTAACCTTTGGGCTCCCCGGGC…
B_left	B_left_4	AGAP007280	4.85125	GACCGTTTGTGTGTCAGAGCAAGTCGAACCCGTTCGAGTGGTATCTGGCCGGTGTGGTAAGTCACGGAGAGGGATGTGCGCGTGCACACGAACCCGGTGTCTACACGCGAGTGGCACTGTTTATCGATTGGATTGCGGAGAAGGTAAATGCGCCACTGCCAGTACGTACTGCACGGGCTGACTGTCCCGGGATGCGATGTATCTGGGGTGGAGGGATCTGTCTACCACCGGGCAAGAAGTGTAACGGATACGTTAACTGTCTTGGTGGGGAGGATGAGTCGGGCTGTGGGATGGATCAGATGCTACGATCGATGTCGCAGCGAGGTGAGGAAGAAACAACTTTATTATACAAAGTTGTGGCGCGCCCCCCAACTGGGGTAACCTTTGGGCTCCCCGGGC…
B_left	B_left_5	AGAP007280	1.79595	GACCGTTTGTGTGTCAGAGCAAATCGAACCCGTTCGAGTGGTATCTGGCCGGTGTGGTAAGTCACGGAGAGGGATGTGCGCGTGCACACGAACCCGGTGTCTACACGCGAGTGGCACTGTTTATCGATTGGATTGCGGAGAAGGTAAATGCGCCACTGCCAGTACGTACTGCACGGGCTGACTGTCCCGGGATGCGATGTATCTGGGGTGGAGGGATCTGTCTACCACCGGGCAAGAAGTGTAACGGATACGTTAACTGTCTTGGTGGTGAGGATGAGTCGGGCTGTGGGATGGATCAGATGCTACGATCGATGTCGCAGCGAGGTGAGGAAGAAACAACTTTATTATACAAAGTTGTGGCGCGCCCCCCAACTGGGGTAACCTTTGGGCTCCCCGGGC…
B_left	B_left_6	AGAP007280	1.31668	GACCGTTTGTGTGTCAGAGCAAGTCGAACCCGTTCGAGTGGTATCTGGCCGGTGTGGTAAGTCACGGGGAGGGATGTGCGCGTGCACACGAACCCGGTGTCTACACGCGAGTGGCACTGTTTATCGATTGGATTGCGGAGAAGGTAAATGCGCCACTGCCAGTACGTACTGCACGGGCTGACTGTCCCGGGATGCGATGTATCTGGGGTGGAGGGATCTGTCTACCACCGGGCAAGAAGTGTAACGGATACGTTAACTGTCTTGGTGGTGAGGATGAGTCGGGCTGTGGGATGGATCAGATGCTACGATCGATGTCGCAGCGAGGTGAGGAAGAAACAACTTTATTATACAAAGTTGTGGCGCGCCCCCCAACTGGGGTAACCTTTGGGCTCCCCGGGC…
B_left	B_left_7	AGAP007280	0.901226	GACCGTTTGTGTGTCAGAGCAAGTCGAACCCGTTCGAGTGGTATCTGGCCGGTGTGGTAAGTCACGGGGAGGGATGTGCGCGTGCACACGAACCCGGTGTCTACACGCGAGTGGCACTGTTTATCGATTGGATTGCGGAGAAGGTAAATGCGCCACTGCCAGTACGTACTGCACGGGCTGACTGTCCCGGGATGCGATGTATCTGGGGTGGAGGGATCTGTCTACCACCGGGCAAGAAGTGTAACGGATACGTTAACTGTCTTGGTGGGGAGGATGAGTCGGGCTGTGGGATGGATCAGATGCTACGATCGATGTCGCAGCGAGGTGAGGAAGAAACAACTTTATTATACAAAGTTGTGGCGCGCCCCCCAACTGGGGTAACCTTTGGGCTCCCCGGGC…
B_right	B_right_1	AGAP007280	35.5401	CAACTTGAAAAAGTGGCACCGAGTCGGTGCTTTTTTTTACGCGTGGGTCCCATGGGTGAGGTGGAGTACGCGCCCGGGGAGCCCAAAGGTTACCCCAGTTGGGGGGCGCGCCCAACTTTGTATAGAAAAGTTGGGTGAGTGAGGAGGAGGGTGGTAGTGCCACACAGAGAGCTTCGGATGTTGATACAACGGAAGCTGAGACTACCGTGTTGTTCACATCGGAAGAAACGACGACGTTAAGCGTGCCGGAAGAAGCGAGTGTAGAAGCGCAGGAGAGTATGATCATGACGAACACAGCACAAACGGAACCGATCACTACTACTACAAGTACAGTTGCCACTACCACACCTCAACTTGAGCTATCTACTGCTGAAGAAAGCACAACGGAGGACAGCTCTA…
B_right	B_right_2	AGAP007280	9.07131	CAACTTGAAAAAGTGGCACCGAGTCGGTGCTTTTTTTTACGCGTGGGTCCCATGGGTGAGGTGGAGTACGCGCCCGGGGAGCCCAAAGGTTACCCCAGTTGGGGGGCGCGCCCAACTTTGTATAGAAAAGTTGGGTGAGTGAGGAGGAGGGTGGTAGTGCCACACAGAGAGCTTCGGATGTGGATACGACGGAAGCTGAGACTACGGTTTTGTTCACATCGGAAGAAACGACGACGTTAAGCGTGCCGGAAGAAGCGAGTGTAGAAGCGCAGGAGAGTATGATCATGACGAACACAGCACAGACGGAACCGATCACTACTACTACAAGTACAGCTGCCCCTACCACACCTCAGCTTGAGCTATCTACTGCAGAAGAAAGCACAACGGAAGATAGCTCTA…
B_right	B_right_3	AGAP007280	4.6773	CAACTTGAAAAAGTGGCACCGAGTCGGTGCTTTTTTTTACGCGTGGGTCCCATGGGTGAGGTGGAGTACGCGCCCGGGGAGCCCAAAGGTTACCCCAGTTGGGGGGCGCGCCCAACTTTGTATAGAAAAGTTGGGTGAGTGAGGAGGAGGGTGGTAGTGCCACACAGAGAGCTTCGGATGTGGATACGACGGAAGCTGAGACTACGGTTTTGTTCACATCGGAAGAAACGACGACGTTAAGCGTGCCGGAAGAAGCGAGTGTAGAAGCGCAGGAGAGTATGATCATGACGAACACAGCACAAACGGAACCGATCACTACTACTACAAGTACAGTTGCCACTACCACACCTCAACTTGAGCTATCTACTGCTGAAGAAAGCACAACGGAGGACAGCTCTA…
B_right	B_right_7	AGAP007280	1.12391	CAACTTGAAAAAGTGGCACCGAGTCGGTGCTTTTTTTTACGCGTGGGTCCCATGGGTGAGGTGGAGTACGCGCCCGGGGAGCCCAAAGGTTACCCCAGTTGGGGGGCGCGCCCAACTTTGTATAGAAAAGTTGGGTGAGTGAGGAGGAGGGTGGTAGTGCCACACAGAGAGCTTCGGATGTTGATACAACGGAAGCTGAGACTACCGTGTTGTTCACATCGGAAGAAACGACGACGTTAAGCGTGCCGGAAGAAGCGAGTGTAGAAGCGCAGGAGAGTATGATCATGACGAACACAGCACAGACGGAACCGATCACTACTACTACAAGTACAGCTGCCCCTACCACACCTCAGCTTGAGCTATCTACTGCAGAAGAAAGCACAACGGAAGATAGCTCTA…
B_right	B_right_9	AGAP007280	0.917601	CAACTTGAAAAAGTGGCACCGAGTCGGTGCTTTTTTTTACGCGTGGGTCCCATGGGTGAGGTGGAGTACGCGCCCGGGGAGCCCAAAGGTTACCCCAGTTGGGGGGCGCGCCCAACTTTGTATAGAAAAGTTGGGTGAGTGAGGAGGAGGGTGGTAGTGCCACACAGAGAGCTTCGGATGTGGATACGACGGAAGCTGAGACTACGGTTTTGTTCACATCGGAAGAAACGACGACGTTAAGCGTGCCGGAAGAAGCGAGTGTAGAAGCGCAGGAGAGTATGATCATGACGAACACAGCACAGACGGAACCGATCACTACTACTACAAGTACAGTTGCCACTACCACACCTCAACTTGAGCTATCTACTGCTGAAGAAAGCACAACGGAGGACAGCTCTA…
B_right	B_right_10	AGAP007280	0.720532	CAACTTGAAAAAGTGGCACCGAGTCGGTGCTTTTTTTTACGCGTGGGTCCCATGGGTGAGGTGGAGTACGCGCCCGGGGAGCCCAAAGGTTACCCCAGTTGGGGGGCGCGCCCAACTTTGTATAGAAAAGTTGGGTGAGTGAGGAGGAGGGTGGTAGTGCCACACAGAGAGCTTCGGATGTTGATACAACGGAAGCTGAGACTACCGTGTTGTTCACATCGGAAGAAACGACGACGTTAAGCGTGCCGGAAGAAGCGAGTGTAGAAGCGCAGGAGAGTATGATCATGACGAACACAGCACAAACGGAACCGATCACTACTACTACAAGTACAGCTGCCCCTACCACACCTCAGCTTGAGCTATCTACTGCAGAAGAAAGCACAACGGAAGATAGCTCTA…
B_right	B_right_11	AGAP007280	0.600443	CAACTTGAAAAAGTGGCACCGAGTCGGTGCTTTTTTTTACGCGTGGGTCCCATGGGTGAGGTGGAGTACGCGCCCGGGGAGCCCAAAGGTTACCCCAGTTGGGGGGCGCGCCCAACTTTGTATAGAAAAGTTGGGTGAGTGAGGAGGAGGGTGGTAGTGCCACACAGAGAGCTTCGGATGTGGATACGACGGAAGCTGAGACTACGGTTTTGTTCACATCGGAAGAAACGACGACGTTAAGCGTGCCGGAAGAAGCGAGTGTAGAAGCGCAGGAGAGTATGATCATGACGAACACAGCACAGACGGAACCGATCACTACTACTACAAGTACAGCTGCCCCTACCACACCTCAGCTTGAGCTATCTACTGCAGAAGAAAGCACAACGGAAGATAGCTCTA…
B_right	B_right_15	AGAP007280	0.504988	CAACTTGAAAAAGTGGCACCGAGTCGGTGCTTTTTTTTACGCGTGGGTCCCATGGGTGAGGTGGAGTACGCGCCCGGGGAGCCCAAAGGTTACCCCAGTTGGGGGGCGCGCCCAACTTTGTATAGAAAAGTTGGGTGAGTGAGGAGGAGGGTGGTAGTGCCACACAGAGAGCTTCGGATGTGGATACGACGGAAGCTGAGACTACCGTGTTGTTCACATCGGAAGAAACGACGACGTTAAGCGTGCCGGAAGAAGCGAGTGTAGAAGCGCAGGAGAGTATGATCATGACGAACACAGCACAAACGGAACCGATCACTACTACTACAAGTACAGTTGCCACTACCACACCTCAACTTGAGCTATCTACTGCTGAAGAAAGCACAACGGAGGACAGCTCTA…
C_left	C_left_1	AGAP007280	44.2417	GACCGTTTGTGTGTCAGAGCAAGTCGAACCCGTTCGAGTGGTATCTGGCCGGTGTGGTAAGTCACGGAGAGGGATGTGCGCGTGCACACGAACCCGGTGTCTACACGCGAGTGGCACTGTTTATCGATTGGATTGCGGAGAAGGTAAATGCGCCACTGCCAGTACGTACTGCACGGGCTGACTGTCCCGGGATGCGATGTATCTGGGGTGGAGGGATCTGTCTACCACCGGGCAAGAAGTGTAACGGATACGTTAACTGTCTTGGTGGTGAGGATGAGTCGGGCTGTGGGATGGATCAGATGCTACGATCGATGTCGCAGCGAGGTGAGGAAGAAACAACTTTATTATACAAAGTTGTGGCGCGCCCCCCAACTGGGGTAACCTTTGGGCTCCCCGGGC…
C_left	C_left_2	AGAP007280	9.23159	GACCGTTTGTGTGTCAGAGCAAATCGAACCCGTTCGAGTGGTATCTGGCCGGTGTGGTAAGTCACGGGGAGGGATGTGCGCGTGCACACGAACCCGGTGTCTACACGCGAGTGGCACTGTTTATCGATTGGATTGCGGAGAAGGTAAATGCGCCACTGCCAGTACGTACTGCACGGGCTGACTGTCCCGGGATGCGATGTATCTGGGGTGGAGGGATCTGTCTACCACCGGGCAAGAAGTGTAACGGATACGTTAACTGTCTTGGTGGTGAGGATGAGTCGGGCTGTGGGATGGATCAGATGCTACGATCGATGTCGCAGCGAGGTGAGGAAGAAACAACTTTATTATACAAAGTTGTGGCGCGCCCCCCAACTGGGGTAACCTTTGGGCTCCCCGGGC…
C_left	C_left_3	AGAP007280	5.56226	GACCGTTTGTGTGTCAGAGCAAATCGAACCCGTTCGAGTGGTATCTGGCCGGTGTGGTAAGTCACGGGGAGGGATGTGCGCGTGCACACGAACCCGGTGTCTACACGCGAGTGGCACTGTTTATCGATTGGATTGCGGAGAAGGTAAATGCGCCACTGCCAGTACGTACTGCACGGGCTGACTGTCCCGGGATGCGATGTATCTGGGGTGGAGGGATCTGTCTACCACCGGGCAAGAAGTGTAACGGATACGTTAACTGTCTTGGTGGGGAGGATGAGTCGGGCTGTGGGATGGATCAGATGCTACGATCGATGTCGCAGCGAGGTGAGGAAGAAACAACTTTATTATACAAAGTTGTGGCGCGCCCCCCAACTGGGGTAACCTTTGGGCTCCCCGGGC…
C_left	C_left_4	AGAP007280	3.52767	GACCGTTTGTGTGTCAGAGCAAGTCGAACCCGTTCGAGTGGTATCTGGCCGGTGTGGTAAGTCACGGAGAGGGATGTGCGCGTGCACACGAACCCGGTGTCTACACGCGAGTGGCACTGTTTATCGATTGGATTGCGGAGAAGGTAAATGCGCCACTGCCAGTACGTACTGCACGGGCTGACTGTCCCGGGATGCGATGTATCTGGGGTGGAGGGATCTGTCTACCACCGGGCAAGAAGTGTAACGGATACGTTAACTGTCTTGGTGGGGAGGATGAGTCGGGCTGTGGGATGGATCAGATGCTACGATCGATGTCGCAGCGAGGTGAGGAAGAAACAACTTTATTATACAAAGTTGTGGCGCGCCCCCCAACTGGGGTAACCTTTGGGCTCCCCGGGC…
C_left	C_left_5	AGAP007280	1.58273	GACCGTTTGTGTGTCAGAGCAAATCGAACCCGTTCGAGTGGTATCTGGCCGGTGTGGTAAGTCACGGAGAGGGATGTGCGCGTGCACACGAACCCGGTGTCTACACGCGAGTGGCACTGTTTATCGATTGGATTGCGGAGAAGGTAAATGCGCCACTGCCAGTACGTACTGCACGGGCTGACTGTCCCGGGATGCGATGTATCTGGGGTGGAGGGATCTGTCTACCACCGGGCAAGAAGTGTAACGGATACGTTAACTGTCTTGGTGGTGAGGATGAGTCGGGCTGTGGGATGGATCAGATGCTACGATCGATGTCGCAGCGAGGTGAGGAAGAAACAACTTTATTATACAAAGTTGTGGCGCGCCCCCCAACTGGGGTAACCTTTGGGCTCCCCGGGC…
C_left	C_left_6	AGAP007280	1.26475	GACCGTTTGTGTGTCAGAGCAAGTCGAACCCGTTCGAGTGGTATCTGGCCGGTGTGGTAAGTCACGGGGAGGGATGTGCGCGTGCACACGAACCCGGTGTCTACACGCGAGTGGCACTGTTTATCGATTGGATTGCGGAGAAGGTAAATGCGCCACTGCCAGTACGTACTGCACGGGCTGACTGTCCCGGGATGCGATGTATCTGGGGTGGAGGGATCTGTCTACCACCGGGCAAGAAGTGTAACGGATACGTTAACTGTCTTGGTGGTGAGGATGAGTCGGGCTGTGGGATGGATCAGATGCTACGATCGATGTCGCAGCGAGGTGAGGAAGAAACAACTTTATTATACAAAGTTGTGGCGCGCCCCCCAACTGGGGTAACCTTTGGGCTCCCCGGGC…
C_left	C_left_7	AGAP007280	0.652099	GACCGTTTGTGTGTCAGAGCAAGTCGAACCCGTTCGAGTGGTATCTGGCCGGTGTGGTAAGTCACGGGGAGGGATGTGCGCGTGCACACGAACCCGGTGTCTACACGCGAGTGGCACTGTTTATCGATTGGATTGCGGAGAAGGTAAATGCGCCACTGCCAGTACGTACTGCACGGGCTGACTGTCCCGGGATGCGATGTATCTGGGGTGGAGGGATCTGTCTACCACCGGGCAAGAAGTGTAACGGATACGTTAACTGTCTTGGTGGGGAGGATGAGTCGGGCTGTGGGATGGATCAGATGCTACGATCGATGTCGCAGCGAGGTGAGGAAGAAACAACTTTATTATACAAAGTTGTGGCGCGCCCCCCAACTGGGGTAACCTTTGGGCTCCCCGGGC…
C_right	C_right_1	AGAP007280	32.4591	CAACTTGAAAAAGTGGCACCGAGTCGGTGCTTTTTTTTACGCGTGGGTCCCATGGGTGAGGTGGAGTACGCGCCCGGGGAGCCCAAAGGTTACCCCAGTTGGGGGGCGCGCCCAACTTTGTATAGAAAAGTTGGGTGAGTGAGGAGGAGGGTGGTAGTGCCACACAGAGAGCTTCGGATGTGGATACAACGGAAGCTGAGACTACCGTTTTGTTCACATCGGAAGAAACGACGACGTTAAGCGTGCCGGAAGAAGCGAGTGTAGAAGCGCAGGAGAGTATGATCATGACGAACACAGCACAGACGGAACCGATCACTACAAGTACAGCTGCCCCTACCACACCCCAACTTGAGCTATCTACTGCTGAAGAAAGCACAACGAAGGACAGCTCTACCTCAG…
C_right	C_right_2	AGAP007280	7.66134	CAACTTGAAAAAGTGGCACCGAGTCGGTGCTTTTTTTTACGCGTGGGTCCCATGGGTGAGGTGGAGTACGCGCCCGGGGAGCCCAAAGGTTACCCCAGTTGGGGGGCGCGCCCAACTTTGTATAGAAAAGTTGGGTGAGTGAGGAGGAGGGTGGTAGTGCCACACAGAGAGCTTCGGATGTTGATACAACGGAAGCTGAGACTACCGTGTTGTTCACATCGGAAGAAACGACGACGTTAAGCGTGCCGGAAGAAGCGAGTGTAGAAGCGCAGGAGAGTATGATCATGACGAACACAGCACAAACGGAACCGATCACTACTACTACAAGTACAGTTGCCACTACCACACCTCAACTTGAGCTATCTACTGCTGAAGAAAGCACAACGGAGGACAGCTCTA…
C_right	C_right_3	AGAP007280	4.5784	CAACTTGAAAAAGTGGCACCGAGTCGGTGCTTTTTTTTACGCGTGGGTCCCATGGGTGAGGTGGAGTACGCGCCCGGGGAGCCCAAAGGTTACCCCAGTTGGGGGGCGCGCCCAACTTTGTATAGAAAAGTTGGGTGAGTGAGGAGGACGGTGGTAGTGCCACACAGAGAGCTTCGGATGTTGATACAACGGAAGCTGAGACTACCGTGTTGTTCACATCGGAAGAAACGACGACGTTAAGCGTGCCGGAAGAAGCGAGTGTAGAAGCGCAGGAGAGTATGATCATGACGAACACAGCACAAACGGAACCGATCACTACTACTACAAGTACAGTTGCCACTACCACACCTCAACTTGAGCTATCTACTGCTGAAGAAAGCACAACGGAGGACAGCTCTA…
C_right	C_right_6	AGAP007280	2.00928	CAACTTGAAAAAGTGGCACCGAGTCGGTGCTTTTTTTTACGCGTGGGTCCCATGGGTGAGGTGGAGTACGCGCCCGGGGAGCCCAAAGGTTACCCCAGTTGGGGGGCGCGCCCAACTTTGTATAGAAAAGTTGGGTGAGTGAGGAGGAGGGTGGTAGTGCCACACAGAGAGCTTCGGATGTGGATACAACGGAAGCTGAGACTACCGTTTTGTTCACATCGGAAGAAACGACGACGTTAAGCGTGCCGGAAGAAGCGAGTGTAGAAGCGCAGGAGAGTATGATCATGACGAACACAGCACAAACGGAACCGATCACTACTACTACAAGTACAGTTGCCACTACCACACCTCAACTTGAGCTATCTACTGCTGAAGAAAGCACAACGGAGGACAGCTCTA…
C_right	C_right_7	AGAP007280	1.26155	CAACTTGAAAAAGTGGCACCGAGTCGGTGCTTTTTTTTACGCGTGGGTCCCATGGGTGAGGTGGAGTACGCGCCCGGGGAGCCCAAAGGTTACCCCAGTTGGGGGGCGCGCCCAACTTTGTATAGAAAAGTTGGGTGAGTGAGGAGGAGGGTGGTAGTGCCACACAGAGAGCTTCGGATGTTGATACAACGGAAGCTGAGACTACCGTGTTGTTCACATCGGAAGAAACGACGACGTTAAGCGTGCCGGAAGAAGCGAGTGTAGAAGCGCAGGAGAGTATGATCATGACGAACACAGCACAGACGGAACCGATCACTACAAGTACAGCTGCCCCTACCACACCCCAACTTGAGCTATCTACTGCTGAAGAAAGCACAACGAAGGACAGCTCTACCTCAG…
C_right	C_right_8	AGAP007280	0.835922	CAACTTGAAAAAGTGGCACCGAGTCGGTGCTTTTTTTTACGCGTGGGTCCCATGGGTGAGGTGGAGTACGCGCCCGGGGAGCCCAAAGGTTACCCCAGTTGGGGGGCGCGCCCAACTTTGTATAGAAAAGTTGGGTGAGTGAGGAGGAGGGTGGTAGTGCCACACAGAGAGCTTCGGATGTGGATACAACGGAAGCTGAGACTACCGTGTTGTTCACATCGGAAGAAACGACGACGTTAAGCGTGCCGGAAGAAGCGAGTGTAGAAGCGCAGGAGAGTATGATCATGACGAACACAGCACAAACGGAACCGATCACTACTACTACAAGTACAGTTGCCACTACCACACCTCAACTTGAGCTATCTACTGCTGAAGAAAGCACAACGGAGGACAGCTCTA…
C_right	C_right_9	AGAP007280	0.751563	CAACTTGAAAAAGTGGCACCGAGTCGGTGCTTTTTTTTACGCGTGGGTCCCATGGGTGAGGTGGAGTACGCGCCCGGGGAGCCCAAAGGTTACCCCAGTTGGGGGGCGCGCCCAACTTTGTATAGAAAAGTTGGGTGAGTGAGGAGGAGGGTGGTAGTGCCACACAGAGAGCTTCGGATGTGGATACAACGGAAGCTGAGACTACCGTTTTGTTCACATCGGAAGAAACGACGACGTTAAGCGTGCCGGAAGAAGCGAGTGTAGAAGCGCAGGAGAGTATGATCATGACGAACACAGCACAGACGGAACCGATCACTACAAGTACAGCTGCCCCTACCACACCCCAACTTGAGCTATCTACTGCTGAAGAAAGCACAACGGAGGACAGCTCTACCTCTG…
C_right	C_right_11	AGAP007280	0.736225	CAACTTGAAAAAGTGGCACCGAGTCGGTGCTTTTTTTTACGCGTGGGTCCCATGGGTGAGGTGGAGTACGCGCCCGGGGAGCCCAAAGGTTACCCCAGTTGGGGGGCGCGCCCAACTTTGTATAGAAAAGTTGGGTGAGTGAGGAGGACGGTGGTAGTGCCACACAGAGAGCTTCGGATGTTGATACAACGGAAGCTGAGACTACCGTGTTGTTCACATCGGAAGAAACGACGACGTTAAGCGTGCCGGAAGAAGCGAGTGTAGAAGCGCAGGAGAGTATGATCATGACGAACACAGCACAGACGGAACCGATCACTACAAGTACAGCTGCCCCTACCACACCCCAACTTGAGCTATCTACTGCTGAAGAAAGCACAACGAAGGACAGCTCTACCTCAG…
D_left	D_left_1	AGAP007280	45.3761	GACCGTTTGTGTGTCAGAGCAAGTCGAACCCGTTCGAGTGGTATCTGGCCGGTGTGGTAAGTCACGGAGAGGGATGTGCGCGTGCACACGAACCCGGTGTCTACACGCGAGTGGCACTGTTTATCGATTGGATTGCGGAGAAGGTAAATGCGCCACTGCCAGTACGTACTGCACGGGCTGACTGTCCCGGGATGCGATGTATCTGGGGTGGAGGGATCTGTCTACCACCGGGCAAGAAGTGTAACGGATATGTTAACTGTCTTGGTGGGGAGGATGAGTCGGGCTGTGGGATGGATCAGATGCTACGATCGATGTCGCAGCGAGGCGAGGAAGAAACAACTTTATTATACAAAGTTGTGGCGCGCCCCCCAACTGGGGTAACCTTTGGGCTCCCCGGGC…
D_left	D_left_2	AGAP007280	4.73049	GACCGTTTGTGTGTCAGAGCAAATCGAACCCGTTCGAGTGGTATCTGGCCGGTGTGGTAAGTCACGGGGAGGGATGTGCGCGTGCACACGAACCCGGTGTCTACACGCGAGTGGCACTGTTTATCGATTGGATTGCGGAGAAGGTAAATGCGCCACTGCCAGTACGTACTGCACGGGCTGACTGTCCCGGGATGCGATGTATCTGGGGTGGAGGGATCTGTCTACCACCGGGCAAGAAGTGTAACGGATATGTTAACTGTCTTGGTGGGGAGGATGAGTCGGGCTGTGGGATGGATCAGATGCTACGATCGATGTCGCAGCGAGGCGAGGAAGAAACAACTTTATTATACAAAGTTGTGGCGCGCCCCCCAACTGGGGTAACCTTTGGGCTCCCCGGGC…
D_left	D_left_3	AGAP007280	2.21031	GACCGTTTGTGTGTCAGAGCAAATCGAACCCGTTCGAGTGGTATCTGGCCGGTGTGGTAAGTCACGGGGAGGGATGTGCGCGTGCACACGAACCCGGTGTCTACACGCGAGTGGCACTGTTTATCGATTGGATTGCGGAGAAGGTAAATGCGCCACTGCCAGTACGTACTGCACGGGCTGACTGTCCCGGGATGCGATGTATCTGGGGTGGAGGGATCTGTCTACCACCGGGCAAGAAGTGTAACGGATACGTTAACTGTCTTGGTGGGGAGGATGAGTCGGGCTGTGGGATGGATCAGATGCTACGATCGATGTCGCAGCGAGGTGAGGAAGAAACAACTTTATTATACAAAGTTGTGGCGCGCCCCCCAACTGGGGTAACCTTTGGGCTCCCCGGGC…
D_left	D_left_4	AGAP007280	2.19196	GACCGTTTGTGTGTCAGAGCAAATCGAACCCGTTCGAGTGGTATCTGGCCGGTGTGGTAAGTCACGGGGAGGGATGTGCGCGTGCACACGAACCCGGTGTCTACACGCGAGTGGCACTGTTTATCGATTGGATTGCGGAGAAGGTAAATGCGCCACTGCCAGTACGTACTGCACGGGCTGACTGTCCCGGGATGCGATGTATCTGGGGTGGAGGGATCTGTCTACCACCGGGCAAGAAGTGTAACGGATACGTTAACTGTCTTGGTGGGGAGGATGAGTCGGGCTGTGGGATGGATCAGATGCTACGATCGATGTCGCAGCGAGGCGAGGAAGAAACAACTTTATTATACAAAGTTGTGGCGCGCCCCCCAACTGGGGTAACCTTTGGGCTCCCCGGGC…
D_left	D_left_5	AGAP007280	2.11398	GACCGTTTGTGTGTCAGAGCAAGTCGAACCCGTTCGAGTGGTATCTGGCCGGTGTGGTAAGTCACGGAGAGGGATGTGCGCGTGCACACGAACCCGGTGTCTACACGCGAGTGGCACTGTTTATCGATTGGATTGCGGAGAAGGTAAATGCGCCACTGCCAGTACGTACTGCACGGGCTGACTGTCCCGGGATGCGATGTATCTGGGGTGGAGGGATCTGTCTACCACCGGGCAAGAAGTGTAACGGATACGTTAACTGTCTTGGTGGGGAGGATGAGTCGGGCTGTGGGATGGATCAGATGCTACGATCGATGTCGCAGCGAGGCGAGGAAGAAACAACTTTATTATACAAAGTTGTGGCGCGCCCCCCAACTGGGGTAACCTTTGGGCTCCCCGGGC…
D_left	D_left_6	AGAP007280	2.01347	GACCGTTTGTGTGTCAGAGCAAGTCGAACCCGTTCGAGTGGTATCTGGCCGGTGTGGTAAGTCACGGAGAGGGATGTGCGCGTGCACACGAACCCGGTGTCTACACGCGAGTGGCACTGTTTATCGATTGGATTGCGGAGAAGGTAAATGCGCCACTGCCAGTACGTACTGCACGGGCTGACTGTCCCGGGATGCGATGTATCTGGGGTGGAGGGATCTGTCTACCACCGGGCAAGAAGTGTAACGGATACGTTAACTGTCTTGGTGGGGAGGATGAGTCGGGCTGTGGGATGGATCAGATGCTACGATCGATGTCGCAGCGAGGTGAGGAAGAAACAACTTTATTATACAAAGTTGTGGCGCGCCCCCCAACTGGGGTAACCTTTGGGCTCCCCGGGC…
D_left	D_left_7	AGAP007280	1.27281	GACCGTTTGTGTGTCAGAGCAAATCGAACCCGTTCGAGTGGTATCTGGCCGGTGTGGTAAGTCACGGAGAGGGATGTGCGCGTGCACACGAACCCGGTGTCTACACGCGAGTGGCACTGTTTATCGATTGGATTGCGGAGAAGGTAAATGCGCCACTGCCAGTACGTACTGCACGGGCTGACTGTCCCGGGATGCGATGTATCTGGGGTGGAGGGATCTGTCTACCACCGGGCAAGAAGTGTAACGGATATGTTAACTGTCTTGGTGGGGAGGATGAGTCGGGCTGTGGGATGGATCAGATGCTACGATCGATGTCGCAGCGAGGCGAGGAAGAAACAACTTTATTATACAAAGTTGTGGCGCGCCCCCCAACTGGGGTAACCTTTGGGCTCCCCGGGC…
D_left	D_left_8	AGAP007280	1.03343	GACCGTTTGTGTGTCAGAGCAAGTCGAACCCGTTCGAGTGGTATCTGGCCGGTGTGGTAAGTCACGGAGAGGGATGTGCGCGTGCACACGAACCCGGTGTCTACACGCGAGTGGCACTGTTTATCGATTGGATTGCGGAGAAGGTAAATGCGCCACTGCCAGTACGTACTGCACGGGCTGACTGTCCCGGGATGCGATGTATCTGGGGTGGAGGGATCTGTCTACCACCGGGCAAGAAGTGTAACGGATATGTTAACTGTCTTGGTGGGGAGGATGAGTCGGGCTGTGGGATGGATCAGATGCTACGATCGATGTCGCAGCGAGGTGAGGAAGAAACAACTTTATTATACAAAGTTGTGGCGCGCCCCCCAACTGGGGTAACCTTTGGGCTCCCCGGGC…
D_left	D_left_9	AGAP007280	0.862439	GACCGTTTGTGTGTCAGAGCAAGTCGAACCCGTTCGAGTGGTATCTGGCCGGTGTGGTAAGTCACGGGGAGGGATGTGCGCGTGCACACGAACCCGGTGTCTACACGCGAGTGGCACTGTTTATCGATTGGATTGCGGAGAAGGTAAATGCGCCACTGCCAGTACGTACTGCACGGGCTGACTGTCCCGGGATGCGATGTATCTGGGGTGGAGGGATCTGTCTACCACCGGGCAAGAAGTGTAACGGATATGTTAACTGTCTTGGTGGGGAGGATGAGTCGGGCTGTGGGATGGATCAGATGCTACGATCGATGTCGCAGCGAGGCGAGGAAGAAACAACTTTATTATACAAAGTTGTGGCGCGCCCCCCAACTGGGGTAACCTTTGGGCTCCCCGGGC…
D_right	D_right_1	AGAP007280	19.8946	CAACTTGAAAAAGTGGCACCGAGTCGGTGCTTTTTTTTACGCGTGGGTCCCATGGGTGAGGTGGAGTACGCGCCCGGGGAGCCCAAAGGTTACCCCAGTTGGGGGGCGCGCCCAACTTTGTATAGAAAAGTTGGGTGAGTGAGGAGGAGGGTGGTAGTGCCACACAGAGAGCTTCGGATGTTGATACAACGGAAGCTGAGACTACCGTGTTGTTCACATCGGAAGAAACGACGACGTTAAGCGTGCCGGAAGAAGCGAGTGTAGAAGCGCAGGAGAGTATGATCATGACGAACACAGCACAAACGGAACCGATCACTACTACTACAAGTACAGTTGCCACTACCACACCTCAACTTGAGCTATCTACTGCTGAAGAAAGCACAACGGAGGACAGCTCTA…
D_right	D_right_2	AGAP007280	15.2251	CAACTTGAAAAAGTGGCACCGAGTCGGTGCTTTTTTTTACGCGTGGGTCCCATGGGTGAGGTGGAGTACGCGCCCGGGGAGCCCAAAGGTTACCCCAGTTGGGGGGCGCGCCCAACTTTGTATAGAAAAGTTGGGTGAGTGAGGAGGAGGGTGGTAGTGCCACACAGAGAGCTTCGGATGTGGATACGACGGAAGCTGAGACTACGGTTTTGTTCACATCGGAAGAAACGACGACGTTAAGCGTGCCGGAAGAAGCGAGTGTAGAAGCGCAGGAGAGTATGATCATGACGAACACAGCACAGACGGAACCGATCACTACTACTACAAGTACAGCTGCCCCTACCACACCTCAGCTTGAGCTATCTACTGCAGAAGAAAGCACAACGGAAGATAGCTCTA…
D_right	D_right_4	AGAP007280	3.87766	CAACTTGAAAAAGTGGCACCGAGTCGGTGCTTTTTTTTACGCGTGGGTCCCATGGGTGAGGTGGAGTACGCGCCCGGGGAGCCCAAAGGTTACCCCAGTTGGGGGGCGCGCCCAACTTTGTATAGAAAAGTTGGGTGAGTGAGGAGGAGGGTGGTAGTGCCACACAGAGAGCTTCGGATGTGGATACGACGGAAGCTGAGACTACGGTTTTGTTCACATCGGAAGAAACGACGACGTTAAGCGTGCCGGAAGAAGCGAGTGTAGAAGCGCAGGAGAGTATGATCATGACGAACACAGCACAAACGGAACCGATCACTACTACTACAAGTACAGTTGCCACTACCACACCTCAACTTGAGCTATCTACTGCTGAAGAAAGCACAACGGAGGACAGCTCTA…
D_right	D_right_5	AGAP007280	2.91249	CAACTTGAAAAAGTGGCACCGAGTCGGTGCTTTTTTTTACGCGTGGGTCCCATGGGTGAGGTGGAGTACGCGCCCGGGGAGCCCAAAGGTTACCCCAGTTGGGGGGCGCGCCCAACTTTGTATAGAAAAGTTGGGTGAGTGAGGAGGACGGTGGTAGTGCCACACAGAGAGCTTCGGATGTTGATACAACGGAAGCTGAGACTACCGTGTTGTTCACATCGGAAGAAACGACGACGTTAAGCGTGCCGGAAGAAGCGAGTGTAGAAGCGCAGGAGAGTATGATCATGACGAACACAGCACAAACGGAACCGATCACTACTACTACAAGTACAGTTGCCACTACCACACCTCAACTTGAGCTATCTACTGCTGAAGAAAGCACAACGGAGGACAGCTCTA…
D_right	D_right_9	AGAP007280	0.842821	CAACTTGAAAAAGTGGCACCGAGTCGGTGCTTTTTTTTACGCGTGGGTCCCATGGGTGAGGTGGAGTACGCGCCCGGGGAGCCCAAAGGTTACCCCAGTTGGGGGGCGCGCCCAACTTTGTATAGAAAAGTTGGGTGAGTGAGGAGGAGGGTGGTAGTGCCACACAGAGAGCTTCGGATGTTGATACAACGGAAGCTGAGACTACCGTGTTGTTCACATCGGAAGAAACGACGACGTTAAGCGTGCCGGAAGAAGCGAGTGTAGAAGCGCAGGAGAGTATGATCATGACGAACACAGCACAGACGGAACCGATCACTACTACTACAAGTACAGCTGCCCCTACCACACCTCAGCTTGAGCTATCTACTGCAGAAGAAAGCACAACGGAAGATAGCTCTA…
E_left	E_left_1	AGAP007280	42.2585	GACCGTTTGTGTGTCAGAGCAAGTCGAACCCGTTCGAGTGGTATCTGGCCGGTGTGGTAAGTCACGGAGAGGGATGTGCGCGTGCACACGAACCCGGTGTCTACACGCGAGTGGCACTGTTTATCGATTGGATTGCGGAGAAGGTAAATGCGCCACTGCCAGTACGTACTGCACGGGCTGACTGTCCCGGGATGCGATGTATCTGGGGTGGAGGGATCTGTCTACCACCGGGCAAGAAGTGTAACGGATACGTTAACTGTCTTGGTGGTGAGGATGAGTCGGGCTGTGGGATGGATCAGATGCTACGATCGATGTCGCAGCGAGGTGAGGAAGAAACAACTTTATTATACAAAGTTGTGGCGCGCCCCCCAACTGGGGTAACCTTTGGGCTCCCCGGGC…
E_left	E_left_2	AGAP007280	8.56381	GACCGTTTGTGTGTCAGAGCAAGTCGAACCCGTTCGAGTGGTATCTGGCCGGTGTGGTAAGTCACGGGGAGGGATGTGCGCGTGCACACGAACCCGGTGTCTACACGCGAGTGGCACTGTTTATCGATTGGATTGCGGAGAAGGTAAATGCGCCACTGCCAGCACGTACTGCGCGGGCTGACTGTCCGGGGATGCGATGTATCTGGGGTGGAGGAATTTGTCTACCACCGGGCAAGAAGTGTAACGGATACGTTAACTGTCTTGGTGGGGAGGATGAGTCGGGCTGTGGGATGGATCAGATGCTACGATCGATGTCGCAGCGAGGTGAGGAAGAAACAACTTTATTATACAAAGTTGTGGCGCGCCCCCCAACTGGGGTAACCTTTGGGCTCCCCGGGC…
E_left	E_left_3	AGAP007280	2.63812	GACCGTTTGTGTGTCAGAGCAAGTCGAACCCGTTCGAGTGGTATCTGGCCGGTGTGGTAAGTCACGGGGAGGGATGTGCGCGTGCACACGAACCCGGTGTCTACACGCGAGTGGCACTGTTTATCGATTGGATTGCGGAGAAGGTAAATGCGCCACTGCCAGCACGTACTGCGCGGGCTGACTGTCCGGGGATGCGATGTATCTGGGGTGGAGGAATTTGTCTACCACCGGGCAAGAAGTGTAACGGATACGTTAACTGTCTTGGTGGTGAGGATGAGTCGGGCTGTGGGATGGATCAGATGCTACGATCGATGTCGCAGCGAGGTGAGGAAGAAACAACTTTATTATACAAAGTTGTGGCGCGCCCCCCAACTGGGGTAACCTTTGGGCTCCCCGGGC…
E_left	E_left_4	AGAP007280	2.21336	GACCGTTTGTGTGTCAGAGCAAGTCGAACCCGTTCGAGTGGTATCTGGCCGGTGTGGTAAGTCACGGGGAGGGATGTGCGCGTGCACACGAACCCGGTGTCTACACGCGAGTGGCACTGTTTATCGATTGGATTGCGGAGAAGGTAAATGCGCCACTGCCAGTACGTACTGCACGGGCTGACTGTCCCGGGATGCGATGTATCTGGGGTGGAGGGATCTGTCTACCACCGGGCAAGAAGTGTAACGGATACGTTAACTGTCTTGGTGGTGAGGATGAGTCGGGCTGTGGGATGGATCAGATGCTACGATCGATGTCGCAGCGAGGTGAGGAAGAAACAACTTTATTATACAAAGTTGTGGCGCGCCCCCCAACTGGGGTAACCTTTGGGCTCCCCGGGC…
E_left	E_left_5	AGAP007280	1.81258	GACCGTTTGTGTGTCAGAGCAAGTCGAACCCGTTCGAGTGGTATCTGGCCGGTGTGGTAAGTCACGGAGAGGGATGTGCGCGTGCACACGAACCCGGTGTCTACACGCGAGTGGCACTGTTTATCGATTGGATTGCGGAGAAGGTAAATGCGCCACTGCCAGCACGTACTGCGCGGGCTGACTGTCCGGGGATGCGATGTATCTGGGGTGGAGGAATTTGTCTACCACCGGGCAAGAAGTGTAACGGATACGTTAACTGTCTTGGTGGGGAGGATGAGTCGGGCTGTGGGATGGATCAGATGCTACGATCGATGTCGCAGCGAGGTGAGGAAGAAACAACTTTATTATACAAAGTTGTGGCGCGCCCCCCAACTGGGGTAACCTTTGGGCTCCCCGGGC…
E_left	E_left_6	AGAP007280	1.8079	GACCGTTTGTGTGTCAGAGCAAGTCGAACCCGTTCGAGTGGTATCTGGCCGGTGTGGTAAGTCACGGAGAGGGATGTGCGCGTGCACACGAACCCGGTGTCTACACGCGAGTGGCACTGTTTATCGATTGGATTGCGGAGAAGGTAAATGCGCCACTGCCAGTACGTACTGCACGGGCTGACTGTCCCGGGATGCGATGTATCTGGGGTGGAGGGATCTGTCTACCACCGGGCAAGAAGTGTAACGGATACGTTAACTGTCTTGGTGGGGAGGATGAGTCGGGCTGTGGGATGGATCAGATGCTACGATCGATGTCGCAGCGAGGTGAGGAAGAAACAACTTTATTATACAAAGTTGTGGCGCGCCCCCCAACTGGGGTAACCTTTGGGCTCCCCGGGC…
E_left	E_left_7	AGAP007280	0.757678	GACCGTTTGTGTGTCAGAGCAAGTCGAACCCGTTCGAGTGGTATCTGGCCGGTGTGGTAAGTCACGGGGAGGGATGTGCGCGTGCACACGAACCCGGTGTCTACACGCGAGTGGCACTGTTTATCGATTGGATTGCGGAGAAGGTAAATGCGCCACTGCCAGCACGTACTGCGCGGGCTGACTGTCCGGGGATGCGATGTATCTGGGGTGGAGGGATCTGTCTACCACCGGGCAAGAAGTGTAACGGATACGTTAACTGTCTTGGTGGTGAGGATGAGTCGGGCTGTGGGATGGATCAGATGCTACGATCGATGTCGCAGCGAGGTGAGGAAGAAACAACTTTATTATACAAAGTTGTGGCGCGCCCCCCAACTGGGGTAACCTTTGGGCTCCCCGGGC…
E_left	E_left_8	AGAP007280	0.576303	GACCGTTTGTGTGTCAGAGCAAGTCGAACCCGTTCGAGTGGTATCTGGCCGGTGTGGTAAGTCACGGAGAGGGATGTGCGCGTGCACACGAACCCGGTGTCTACACGCGAGTGGCACTGTTTATCGATTGGATTGCGGAGAAGGTAAATGCGCCACTGCCAGTACGTACTGCACGGGCTGACTGTCCCGGGATGCGATGTATCTGGGGTGGAGGAATTTGTCTACCACCGGGCAAGAAGTGTAACGGATACGTTAACTGTCTTGGTGGGGAGGATGAGTCGGGCTGTGGGATGGATCAGATGCTACGATCGATGTCGCAGCGAGGTGAGGAAGAAACAACTTTATTATACAAAGTTGTGGCGCGCCCCCCAACTGGGGTAACCTTTGGGCTCCCCGGGC…
E_left	E_left_9	AGAP007280	0.564016	GACCGTTTGTGTGTCAGAGCAAGTCGAACCCGTTCGAGTGGTATCTGGCCGGTGTGGTAAGTCACGGAGAGGGATGTGCGCGTGCACACGAACCCGGTGTCTACACGCGAGTGGCACTGTTTATCGATTGGATTGCGGAGAAGGTAAATGCGCCACTGCCAGCACGTACTGCGCGGGCTGACTGTCCGGGGATGCGATGTATCTGGGGTGGAGGAATTTGTCTACCACCGGGCAAGAAGTGTAACGGATACGTTAACTGTCTTGGTGGTGAGGATGAGTCGGGCTGTGGGATGGATCAGATGCTACGATCGATGTCGCAGCGAGGTGAGGAAGAAACAACTTTATTATACAAAGTTGTGGCGCGCCCCCCAACTGGGGTAACCTTTGGGCTCCCCGGGC…
E_right	E_right_1	AGAP007280	36.3884	CAACTTGAAAAAGTGGCACCGAGTCGGTGCTTTTTTTTACGCGTGGGTCCCATGGGTGAGGTGGAGTACGCGCCCGGGGAGCCCAAAGGTTACCCCAGTTGGGGGGCGCGCCCAACTTTGTATAGAAAAGTTGGGTGAGTGAGGAGGAGGGTGGTAGTGCCACACAGAGAGCTTCGGATGTGGATACAACGGAAGCTGAGACTACCGTTTTGTTCACATCGGAAGAAACGACGACGTTAAGCGTGCCGGAAGAAGCGAGTGTAGAAGCGCAGGAGAGTATGATCATGACGAACACAGCACAGACGGAACCGATCACTACAAGTACAGCTGCCCCTACCACACCCCAACTTGAGCTATCTACTGCTGAAGAAAGCACAACGAAGGACAGCTCTACCTCAG…
E_right	E_right_2	AGAP007280	8.06059	CAACTTGAAAAAGTGGCACCGAGTCGGTGCTTTTTTTTACGCGTGGGTCCCATGGGTGAGGTGGAGTACGCGCCCGGGGAGCCCAAAGGTTACCCCAGTTGGGGGGCGCGCCCAACTTTGTATAGAAAAGTTGGGTGAGTGAGGAGGAGGGTGGTAGTGCCACTCAGAGAGCTTCGGATGCGGATACAACGGAAGCTGAGACTACCGTTTTGTTCACATCGGAAGAAACGACGACGTTAAGCGTGCCGGAAGAAGCGAGTGTAGAAGCGCAGGAGAGTATGATCATGACGAACACAGCACAGACGGAACCGATCTCTACTACAACAAGTACAGCTGCCCCTACCACACCTCAGCTTGAGCTATCTACTGTAGAAGAAAGCACAACGGAGGACAGCTCTA…
E_right	E_right_3	AGAP007280	4.15009	CAACTTGAAAAAGTGGCACCGAGTCGGTGCTTTTTTTTACGCGTGGGTCCCATGGGTGAGGTGGAGTACGCGCCCGGGGAGCCCAAAGGTTACCCCAGTTGGGGGGCGCGCCCAACTTTGTATAGAAAAGTTGGGTGAGTGAGGAGGAGGGTGGTAGTGCCACACAGAGAGCTTCGGATGTGGATACAACGGAAGCTGAGACTACCGTTTTGTTCACATCGGAAGAAACGACGACGTTAAGCGTGCCGGAAGAAGCGAGTGTAGAAGCGCAGGAGAGTATGATCATGACGAACACAGCACAGACGGAACCGATCTCTACTACAACAAGTACAGCTGCCCCTACCACACCTCAGCTTGAGCTATCTACTGTAGAAGAAAGCACAACGGAGGACAGCTCTA…
E_right	E_right_6	AGAP007280	1.73394	CAACTTGAAAAAGTGGCACCGAGTCGGTGCTTTTTTTTACGCGTGGGTCCCATGGGTGAGGTGGAGTACGCGCCCGGGGAGCCCAAAGGTTACCCCAGTTGGGGGGCGCGCCCAACTTTGTATAGAAAAGTTGGGTGAGTGAGGAGGAGGGTGGTAGTGCCACTCAGAGAGCTTCGGATGCGGATACAACGGAAGCTGAGACTACCGTTTTGTTCACATCGGAAGAAACGACGACGTTAAGCGTGCCGGAAGAAGCGAGTGTAGAAGCGCAGGAGAGTATGATCATGACGAACACAGCACAGACGGAACCGATCACTACAAGTACAGCTGCCCCTACCACACCCCAACTTGAGCTATCTACTGCTGAAGAAAGCACAACGAAGGACAGCTCTACCTCAG…
F_left	F_left_1	AGAP007280	36.3742	GACCGTTTGTGTGTCAGAGCAAGTCGAACCCGTTCGAGTGGTATCTGGCCGGTGTGGTAAGTCACGGAGAGGGATGTGCGCGTGCACACGAACCCGGTGTCTACACGCGAGTGGCACTGTTTATCGATTGGATTGCGGAGAAGGTAAATGCGCCACTGCCAGTACGTACTGCACGGGCTGACTGTCCCGGGATGCGATGTATCTGGGGTGGAGGGATCTGTCTACCACCGGGCAAGAAGTGTAACGGATACGTTAACTGTCTTGGTGGTGAGGATGAGTCGGGCTGTGGGATGGATCAGATGCTACGATCGATGTCGCAGCGAGGTGAGGAAGAAACAACTTTATTATACAAAGTTGTGGCGCGCCCCCCAACTGGGGTAACCTTTGGGCTCCCCGGGC…
F_left	F_left_2	AGAP007280	16.8324	GACCGTTTGTGTGTCAGAGCAAGTCGAACCCGTTCGAGTGGTATCTGGCCGGTGTGGTAAGTCACGGGGAGGGATGTGCGCGTGCACACGAACCCGGTGTCTACACGCGAGTGGCACTGTTTATCGATTGGATTGCGGAGAAGGTAAATGCGCCACTGCCAGCACGTACTGCGCGGGCTGACTGTCCGGGGATGCGATGTATCTGGGGTGGAGGGATCTGTCTACCACCGGGCAAGAAGTGTAACGGATACGTTAACTGTCTTGGTGGTGAGGATGAGTCGGGCTGTGGGATGGATCAGATGCTACGATCGATGTCGCAGCGAGGTGAGGAAGAAACAACTTTATTATACAAAGTTGTGGCGCGCCCCCCAACTGGGGTAACCTTTGGGCTCCCCGGGC…
F_left	F_left_3	AGAP007280	3.78466	GACCGTTTGTGTGTCAGAGCAAGTCGAACCCGTTCGAGTGGTATCTGGCCGGTGTGGTAAGTCACGGGGAGGGATGTGCGCGTGCACACGAACCCGGTGTCTACACGCGAGTGGCACTGTTTATCGATTGGATTGCGGAGAAGGTAAATGCGCCACTGCCAGTACGTACTGCACGGGCTGACTGTCCCGGGATGCGATGTATCTGGGGTGGAGGGATCTGTCTACCACCGGGCAAGAAGTGTAACGGATACGTTAACTGTCTTGGTGGTGAGGATGAGTCGGGCTGTGGGATGGATCAGATGCTACGATCGATGTCGCAGCGAGGTGAGGAAGAAACAACTTTATTATACAAAGTTGTGGCGCGCCCCCCAACTGGGGTAACCTTTGGGCTCCCCGGGC…
F_left	F_left_4	AGAP007280	3.76006	GACCGTTTGTGTGTCAGAGCAAGTCGAACCCGTTCGAGTGGTATCTGGCCGGTGTGGTAAGTCACGGAGAGGGATGTGCGCGTGCACACGAACCCGGTGTCTACACGCGAGTGGCACTGTTTATCGATTGGATTGCGGAGAAGGTAAATGCGCCACTGCCAGCACGTACTGCGCGGGCTGACTGTCCGGGGATGCGATGTATCTGGGGTGGAGGGATCTGTCTACCACCGGGCAAGAAGTGTAACGGATACGTTAACTGTCTTGGTGGTGAGGATGAGTCGGGCTGTGGGATGGATCAGATGCTACGATCGATGTCGCAGCGAGGTGAGGAAGAAACAACTTTATTATACAAAGTTGTGGCGCGCCCCCCAACTGGGGTAACCTTTGGGCTCCCCGGGC…
F_right	F_right_1	AGAP007280	28.3389	CAACTTGAAAAAGTGGCACCGAGTCGGTGCTTTTTTTTACGCGTGGGTCCCATGGGTGAGGTGGAGTACGCGCCCGGGGAGCCCAAAGGTTACCCCAGTTGGGGGGCGCGCCCAACTTTGTATAGAAAAGTTGGGTGAGTGAGGAGGAGGGTGGTAGTGCCACACAGAGAGCTTCGGATGTGGATACAACGGAAGCTGAGACTACCGTTTTGTTCACATCGGAAGAAACGACGACGTTAAGCGTGCCGGAAGAAGCGAGTGTAGAAGCGCAGGAGAGTATGATCATGACGAACACAGCACAGACGGAACCGATCACTACAAGTACAGCTGCCCCTACCACACCCCAACTTGAGCTATCTACTGCTGAAGAAAGCACAACGAAGGACAGCTCTACCTCAG…
F_right	F_right_2	AGAP007280	15.6541	CAACTTGAAAAAGTGGCACCGAGTCGGTGCTTTTTTTTACGCGTGGGTCCCATGGGTGAGGTGGAGTACGCGCCCGGGGAGCCCAAAGGTTACCCCAGTTGGGGGGCGCGCCCAACTTTGTATAGAAAAGTTGGGTGAGTGAGGAGGAGGGTGGTAGTGCCACACAGAGAGCTTCGGATGTGGATACAACGGAAGCTGAGACTACCGTATTGTTCACATCGGAAGAAACGACGACGTTAAGCGTGCCGGAAGAAGCGAGTGTAGAAGCGCAGGAGAGTATGATCATGACGAACACAGCACAGACGGAACCGATCACTACTACTACAAGTACAGTTGCCACTACCACACCTCAGCTTGAGCTATCTACTGCTGAAGAAAGCACAACGGAGGACAGCTCTA…
F_right	F_right_3	AGAP007280	5.44581	CAACTTGAAAAAGTGGCACCGAGTCGGTGCTTTTTTTTACGCGTGGGTCCCATGGGTGAGGTGGAGTACGCGCCCGGGGAGCCCAAAGGTTACCCCAGTTGGGGGGCGCGCCCAACTTTGTATAGAAAAGTTGGGTGAGTGAGGAGGAGGGTGGTAGTGCCACACAGAGAGCTTCGGATGTGGATACAACGGAAGCTGAGACTACCGTTTTGTTCACATCGGAAGAAACGACGACGTTAAGCGTGCCGGAAGAAGCGAGTGTAGAAGCGCAGGAGAGTATGATCATGACGAACACAGCACAGACGGAACCGATCACTACTACTACAAGTACAGTTGCCACTACCACACCTCAGCTTGAGCTATCTACTGCTGAAGAAAGCACAACGGAGGACAGCTCTA…
F_right	F_right_5	AGAP007280	2.43509	CAACTTGAAAAAGTGGCACCGAGTCGGTGCTTTTTTTTACGCGTGGGTCCCATGGGTGAGGTGGAGTACGCGCCCGGGGAGCCCAAAGGTTACCCCAGTTGGGGGGCGCGCCCAACTTTGTATAGAAAAGTTGGGTGAGTGAGGAGGAGGGTGGTAGTGCCACACAGAGAGCTTCGGATGTGGATACAACGGAAGCTGAGACTACCGTATTGTTCACATCGGAAGAAACGACGACGTTAAGCGTGCCGGAAGAAGCGAGTGTAGAAGCGCAGGAGAGTATGATCATGACGAACACAGCACAGACGGAACCGATCACTACAAGTACAGCTGCCCCTACCACACCCCAACTTGAGCTATCTACTGCTGAAGAAAGCACAACGAAGGACAGCTCTACCTCAG…
F_right	F_right_9	AGAP007280	0.844825	CAACTTGAAAAAGTGGCACCGAGTCGGTGCTTTTTTTTACGCGTGGGTCCCATGGGTGAGGTGGAGTACGCGCCCGGGGAGCCCAAAGGTTACCCCAGTTGGGGGGCGCGCCCAACTTTGTATAGAAAAGTTGGGTGAGTGAGGAGGAGGGTGGTAGTGCCACACAGAGAGCTTCGGATGTGGATACAACGGAAGCTGAGACTACCGTTTTGTTCACATCGGAAGAAACGACGACGTTAAGCGTGCCGGAAGAAGCGAGTGTAGAAGCGCAGGAGAGTATGATCATGACGAACACAGCACAGACGGAACCGATCACTACAAGTACAGCTGCCCCTACCACACCCCAACTTGAGCTATCTACTGCTGAAGAAAGCACAACGGAGGACAGCTCTACCTCAG…
F_right	F_right_11	AGAP007280	0.525945	CAACTTGAAAAAGTGGCACCGAGTCGGTGCTTTTTTTTACGCGTGGGTCCCATGGGTGAGGTGGAGTACGCGCCCGGGGAGCCCAAAGGTTACCCCAGTTGGGGGGCGCGCCCAACTTTGTATAGAAAAGTTGGGTGAGTGAGGAGGAGGGTGGTAGTGCCACACAGAGAGCTTCGGATGTGGATACAACGGAAGCTGAGACTACCGTTTTGTTCACATCGGAAGAAACGACGACGTTAAGCGTGCCGGAAGAAGCGAGTGTAGAAGCGCAGGAGAGTATGATCATGACGAACACAGCACAGACGGAACCGATCACTACAAGTACAGCTGCCCCTACCACACCCCAACTTGAGCTATCTACTGCTGAAGAAAGCACAACGAAGGACAGCTCTACCTCAG…
F_right	F_right_12	AGAP007280	0.521804	CAACTTGAAAAAGTGGCACCGAGTCGGTGCTTTTTTTTACGCGTGGGTCCCATGGGTGAGGTGGAGTACGCGCCCGGGGAGCCCAAAGGTTACCCCAGTTGGGGGGCGCGCCCAACTTTGTATAGAAAAGTTGGGTGAGTGAGGAGGAGGGTGGTAGTGCCACACAGAGAGCTTCGGATGTGGATACAACGGAAGCTGAGACTACCGTATTGTTCACATCGGAAGAAACGACGACGTTAAGCGTGCCGGAAGAAGCGAGTGTAGAAGCGCAGGAGAGTATGATCATGACGAACACAGCACAGACGGAACCGATCACTACTACTACAAGTACAGTTGCCACTACCACACCTCAGCTTGAGCTATCTACTGCTGAAGAAAGCACAACGGAGGACAGCTCTA…
F_right	F_right_13	AGAP007280	0.505239	CAACTTGAAAAAGTGGCACCGAGTCGGTGCTTTTTTTTACGCGTGGGTCCCATGGGTGAGGTGGAGTACGCGCCCGGGGAGCCCAAAGGTTACCCCAGTTGGGGGGCGCGCCCAACTTTGTATAGAAAAGTTGGGTGAGTGAGGAGGAGGGTGGTAGTGCCACACAGAGAGCTTCGGATGTGGATACAACGGAAGCTGAGACTACCGTATTGTTCACATCGGAAGAAACGACGACGTTAAGCGTGCCGGAAGAAGCGAGTGTAGAAGCGCAGGAGAGTATGATCATGACGAACACAGCACAGACGGAACCGATCACTACTACTACAAGTACAGTTGCCACTACCACACCTCAGCTTGAGCTATCTACTGCTGAAGAAAGCACAACGAAGGACAGCTCTA…
G_left	G_left_1	AGAP005958	41.5	GCGCACATTAAGCCGTACCCTTGCTGGGCCTATCAGGAGGAGGGCAATTGCAACTCGCTCCAATCCGTCATCGATCTGTACGTGGATGTGAAGGTACGTTGTGTTACCGTGGCCACCGTGCTTTTGCGGTAGGATGAAAACGTGCTAACGTGTCGTCTCTTTCCTTGCAGCGCATCGCGTGGGTGCTGGACTCGGGCATCACCAACTTCCTGGAGCAACCGATCAAGCGCTGCCCGCCGAAGGTGTATGCCTTCAACTTGAGCAACGACAAGACGGTCAAGACGATCGACCTGTCGGAGATTGTGAAATCCAGCTCAACTTTATTATACAAAGTTGTGGCGCGCCCCCCAACTGGGGTAACCTTTGGGCTCCCCGGGCGCGTACTCCACCTCACCCATG…
G_left	G_left_2	AGAP005958	6.74939	GCGCACATTAAGCCGTACCCTTGCTGGGCCTATCAGGAGGAGGGCAATTGCAACTCGCTCCAATCCGTCATCGATCTGTACGTGGATGTGAAGGTACGTTGTGTTACCGGGGCCATTGGTTTTGCGGTAGGATGAAAACGTTGCTAACGTGTTGTCTCTTTCCTTGCAGCGCATCGCGTGGGTGCTGGACTCGGGCATTACCAACTTCCTGGAGCAACCGATTAAGCGCTGCCCGCCGAAGGTGTATGCCTTCAACTTGAGCAATGACAAGACGGTCAAGACGATCGATCTGTCGGAGATTGTGAAATCCAGCTCAACTTTATTATACAAAGTTGTGGCGCGCCCCCCAACTGGGGTAACCTTTGGGCTCCCCGGGCGCGTACTCCACCTCACCCATGG…
G_left	G_left_5	AGAP005958	1.38234	GCGCACATTAAGCCGTACCCTTGCTGGGCCTATCAGGAGGAGGGCAATTGCAACTCGCTCCAATCCGTCATCGATCTGTACGTGGATGTGAAGGTACGTTGTGTTACCGTGGCCACCGTGCTTTTGCGGTAGGATGAAAACGTGCTAACGTGTCGTCTCTTTCCTTGCAGCGCATCGCGTGGGTGCTGGACTCGGGCATCACCAACTTCCTGGAGCAACCGATCAAGCGCTGCCCGCCGAAGGTGTATGCCTTCAACTTGAGCAATGACAAGACGGTCAAGACGATCGATCTGTCGGAGATTGTGAAATCCAGCTCAACTTTATTATACAAAGTTGTGGCGCGCCCCCCAACTGGGGTAACCTTTGGGCTCCCCGGGCGCGTACTCCACCTCACCCATG…
G_left	G_left_6	AGAP005958	0.959358	GCGCACATTAAGCCGTACCCTTGCTGGGCCTATCAGGAGGAGGGCAATTGCAACTCGCTCCAATCCGTCATCGATCTGTACGTGGATGTGAAGGTACGTTGTGTTACCGGGGCCATTGGTTTTGCGGTAGGATGAAAACGTTGCTAACGTGTTGTCTCTTTCCTTGCAGCGCATCGCGTGGGTGCTGGACTCGGGCATTACCAACTTCCTGGAGCAACCGATTAAGCGCTGCCCGCCGAAGGTGTATGCCTTCAACTTGAGCAACGACAAGACGGTCAAGACGATCGACCTGTCGGAGATTGTGAAATCCAGCTCAACTTTATTATACAAAGTTGTGGCGCGCCCCCCAACTGGGGTAACCTTTGGGCTCCCCGGGCGCGTACTCCACCTCACCCATGG…
G_left	G_left_7	AGAP005958	0.935243	GCGCACATTAAGCCGTACCCTTGCTGGGCCTATCAGGAGGAGGGCAATTGCAACTCGCTCCAATCCGTCATCGATCTGTACGTGGATGTGAAGGTACGTTGTGTTACCGGGGCCATTGGTTTTGCGGTAGGATGAAAACGTTGCTAACGTGTTGTCTCTTTCCTTGCAGCGCATCGCGTGGGTGCTGGACTCGGGCATCACCAACTTCCTGGAGCAACCGATCAAGCGCTGCCCGCCGAAGGTGTATGCCTTCAACTTGAGCAACGACAAGACGGTCAAGACGATCGACCTGTCGGAGATTGTGAAATCCAGCTCAACTTTATTATACAAAGTTGTGGCGCGCCCCCCAACTGGGGTAACCTTTGGGCTCCCCGGGCGCGTACTCCACCTCACCCATGG…
G_left	G_left_8	AGAP005958	0.733205	GCGCACATTAAGCCGTACCCTTGCTGGGCCTATCAGGAGGAGGGCAATTGCAACTCGCTCCAATCCGTCATCGATCTGTACGTGGATGTGAAGGTACGTTGTGTTACCGTGGCCACCGTGCTTTTGCGGTAGGATGAAAACGTGCTAACGTGTCGTCTCTTTCCTTGCAGCGCATCGCGTGGGTGCTGGACTCGGGCATCACCAACTTCCTGGAGCAACCGATCAAGCGCTGCCCGCCGAAGGTGTATGCCTTCAACTTGAGCAACGACAAGACGGTCAAGACGATCGATCTGTCGGAGATTGTGAAATCCAGCTCAACTTTATTATACAAAGTTGTGGCGCGCCCCCCAACTGGGGTAACCTTTGGGCTCCCCGGGCGCGTACTCCACCTCACCCATG…
G_left	G_left_9	AGAP005958	0.715608	GCGCACATTAAGCCGTACCCTTGCTGGGCCTATCAGGAGGAGGGCAATTGCAACTCGCTCCAATCCGTCATCGATCTGTACGTGGATGTGAAGGTACGTTGTGTTACCGTGGCCACCGTGCTTTTGCGGTAGGATGAAAACGTGCTAACGTGTCGTCTCTTTCCTTGCAGCGCATCGCGTGGGTGCTGGACTCGGGCATTACCAACTTCCTGGAGCAACCGATTAAGCGCTGCCCGCCGAAGGTGTATGCCTTCAACTTGAGCAATGACAAGACGGTCAAGACGATCGATCTGTCGGAGATTGTGAAATCCAGCTCAACTTTATTATACAAAGTTGTGGCGCGCCCCCCAACTGGGGTAACCTTTGGGCTCCCCGGGCGCGTACTCCACCTCACCCATG…
G_left	G_left_10	AGAP005958	0.61524	GCGCACATTAAGCCGTACCCTTGCTGGGCCTATCAGGAGGAGGGCAATTGCAACTCGCTCCAATCCGTCATCGATCTGTACGTGGATGTGAAGGTACGTTGTGTTACCGGGGCCATTGGTTTTGCGGTAGGATGAAAACGTTGCTAACGTGTTGTCTCTTTCCTTGCAGCGCATCGCGTGGGTGCTGGACTCGGGCATTACCAACTTCCTGGAGCAACCGATCAAGCGCTGCCCGCCGAAGGTGTATGCCTTCAACTTGAGCAACGACAAGACGGTCAAGACGATCGACCTGTCGGAGATTGTGAAATCCAGCTCAACTTTATTATACAAAGTTGTGGCGCGCCCCCCAACTGGGGTAACCTTTGGGCTCCCCGGGCGCGTACTCCACCTCACCCATGG…
G_left	G_left_11	AGAP005958	0.516176	GCGCACATTAAGCCGTACCCTTGCTGGGCCTATCAGGAGGAGGGCAATTGCAACTCGCTCCAATCCGTCATCGATCTGTACGTGGATGTGAAGGTACGTTGTGTTACCGGGGCCATTGGTTTTGCGGTAGGATGAAAACGTGCTAACGTGTCGTCTCTTTCCTTGCAGCGCATCGCGTGGGTGCTGGACTCGGGCATCACCAACTTCCTGGAGCAACCGATCAAGCGCTGCCCGCCGAAGGTGTATGCCTTCAACTTGAGCAACGACAAGACGGTCAAGACGATCGACCTGTCGGAGATTGTGAAATCCAGCTCAACTTTATTATACAAAGTTGTGGCGCGCCCCCCAACTGGGGTAACCTTTGGGCTCCCCGGGCGCGTACTCCACCTCACCCATGGG…
G_left	G_left_12	AGAP005958	0.5064	GCGCACATTAAGCCGTACCCTTGCTGGGCCTATCAGGAGGAGGGCAATTGCAACTCGCTCCAATCCGTCATCGATCTGTACGTGGATGTGAAGGTACGTTGTGTTACCGTGGCCACCGTGCTTTTGCGGTAGGATGAAAACGTGCTAACGTGTCGTCTCTTTCCTTGCAGCGCATCGCGTGGGTGCTGGACTCGGGCATCACCAACTTCCTGGAGCAACCGATTAAGCGCTGCCCGCCGAAGGTGTATGCCTTCAACTTGAGCAATGACAAGACGGTCAAGACGATCGATCTGTCGGAGATTGTGAAATCCAGCTCAACTTTATTATACAAAGTTGTGGCGCGCCCCCCAACTGGGGTAACCTTTGGGCTCCCCGGGCGCGTACTCCACCTCACCCATG…
G_right	G_right_1	AGAP005958	29.2368	CAATGTATCTTTCCGGAGCGATCGCATGGGTGAGGTGGAGTACGCGCCCGGGGAGCCCAAAGGTTACCCCAGTTGGGGGGCGCGCCCAACTTTGTATAGAAAAGTTGGGTGCGCGGCTCCAGTATCTCGTCACTGATTACAACGAGCTCGGCCATCCGTTTGTGTAAGTATTGCGTTGGGTAAAACCTACAAAGTAAAATCACGTGCGTGAAGCTAACGATCTCCACGACTTGCAGTTACATTTCCGACGGCGATGGTGCAATCATTGTGCTGGACGTGAACAACAACAAGAGCTTCCGCGTGGTACTACCGCGTGCCATCTCGGCTGGCTGCGGCGATTCGGACGTGCTCTACCTGCTGCTCATCCCGAAACCGAAGGGCCAGAGCCTGGTGATCTTC…
G_right	G_right_2	AGAP005958	11.7414	CAATGTATCTTTCCGGAGCGATCGCATGGGTGAGGTGGAGTACGCGCCCGGGGAGCCCAAAGGTTACCCCAGTTGGGGGGCGCGCCCAACTTTGTATAGAAAAGTTGGGTGCGCGGCTCCAGTATCTCGTCACTGATTACAACGAGCTCGGCCATCCGTTTGTGTAAGTATTGCGTTGGGTAAAACCTACAAAGTAAAATCACGTGCGTGAAGCTAACGATCTCCACGACTTGCAGTTACATTTCCGACGGCGATGGTGCAATCATTGTGCTGGACGTGAACAACAACAAGAGCTTCCGCGTGGTGCTACCGCGTGCCATCTCGGCTGGCTGCGGCGATTCAGATGTGCTTTACCTGCTGCTCATCCCGAAACCGAAGGGCCAGAGCCTGGTGATCTTC…
G_right	G_right_3	AGAP005958	7.76558	CAATGTATCTTTCCGGAGCGATCGCATGGGTGAGGTGGAGTACGCGCCCGGGGAGCCCAAAGGTTACCCCAGTTGGGGGGCGCGCCCAACTTTGTATAGAAAAGTTGGGTGCGCGGCTCCAGTATCTCGTCACTGATTACAACGAGCTCGGCCATCCGTTTGTGTAAGTATTGCGTTGGGTAAAACCAACAAAGTAAAATCACGTGCGTGAAGCTAACGATCTCCACGACTTGCAGTTACATTTCCGACGGCGATGGTGCAATCATTGTGCTGGACGTGAACAACAACAAGAGCTTCCGCGTGGTACTACCGCGTGCCATCTCGGCTGGCTGCGGCGATTCGGACGTGCTCTACCTGCTGCTCATCCCGAAACCGAAGGGCCAGAGCCTGGTGATCTTC…
G_right	G_right_4	AGAP005958	3.18124	CAATGTATCTTTCCGGAGCGATCGCATGGGTGAGGTGGAGTACGCGCCCGGGGAGCCCAAAGGTTACCCCAGTTGGGGGGCGCGCCCAACTTTGTATAGAAAAGTTGGGTGCGCGGCTCCAGTATCTCGTCACTGATTACAACGAGCTCGGCCATCCGTTTGTGTAAGTATTGCGTTGGGTAAAACCAACAAAGTAAAATCACGTGCGTGAAGCTAACGATCTCCACGACTTGCAGTTACATTTCCGACGGCGATGGTGCAATCATTGTGCTGGACGTGAACAACAACAAGAGCTTCCGCGTGGTGCTACCGCGTGCCATCTCGGCTGGCTGCGGCGATTCAGATGTGCTTTACCTGCTGCTCATCCCGAAACCGAAGGGCCAGAGCCTGGTGATCTTC…
G_right	G_right_10	AGAP005958	1.01906	CAATGTATCTTTCCGGAGCGATCGCATGGGTGAGGTGGAGTACGCGCCCGGGGAGCCCAAAGGTTACCCCAGTTGGGGGGCGCGCCCAACTTTGTATAGAAAAGTTGGGTGCGCGGCTCCAGTATCTCGTCACTGATTACAACGAGCTCGGCCATCCGTTTGTGTAAGTATTGCGTTGGGTAAAACCTACAAAGTAAAATCACGTGCGTGAAGCTAACGATCTCCACGACTTGCAGTTACATTTCCGACGGCGATGGTGCAATCATTGTGCTGGACGTGAACAACAACAAGAGCTTCCGCGTGGTGCTACCGCGTGCCATCTCGGCTGGCTGCGGCGATTCGGACGTGCTCTACCTGCTGCTCATCCCGAAACCGAAGGGCCAGAGCCTGGTGATCTTC…
G_right	G_right_12	AGAP005958	0.970556	CAATGTATCTTTCCGGAGCGATCGCATGGGTGAGGTGGAGTACGCGCCCGGGGAGCCCAAAGGTTACCCCAGTTGGGGGGCGCGCCCAACTTTGTATAGAAAAGTTGGGTGCGCGGCTCCAGTATCTCGTCACTGATTACAACGAGCTCGGCCATCCGTTTGTGTAAGTATTGCGTTGGGTAAAACCTACAAAGTAAAATCACGTGCGTGAAGCTAACGATCTCCACGACTTGCAGTTACATTTCCGACGGCGATGGTGCAATCATTGTGCTGGACGTGAACAACAACAAGAGCTTCCGCGTGGTACTACCGCGTGCCATCTCGGCTGGCTGCGGCGATTCAGATGTGCTTTACCTGCTGCTCATCCCGAAACCGAAGGGCCAGAGCCTGGTGATCTTC…
H_left	H_left_1	AGAP005958	24.9645	GCGCACATTAAGCCGTACCCTTGCTGGGCCTATCAGGAGGAGGGCAATTGCAACTCGCTCCAATCCGTCATCGATCTGTACGTGGATGTGAAGGTACGTTGTGTTACCGTGGCCACCGTGCTTTTGCGGTAGGATGAAAACGTGCTAACGTGTCGTCTCTTTCCTTGCAGCGCATCGCGTGGGTGCTGGACTCGGGCATCACCAACTTCCTGGAGCAACCGATCAAGCGCTGCCCGCCGAAGGTGTATGCCTTCAACTTGAGCAACGACAAGACGGTCAAGACGATCGACCTGTCGGAGATTGTGAAATCCAGCTCAACTTTATTATACAAAGTTGTGGCGCGCCCCCCAACTGGGGTAACCTTTGGGCTCCCCGGGCGCGTACTCCACCTCACCCATG…
H_left	H_left_2	AGAP005958	10.9671	GCGCACATTAAGCCGTACCCTTGCTGGGCCTATCAGGAGGAGGGCAATTGCAACTCGCTCCAATCCGTCATCGATCTGTACGTGGATGTGAAGGTACGTTGTGTTACCGGGGCCATTGGTTTTGCGGTAGGATGAAAACGTTGCTAACGTGTTGTCTCTTTCCTTGCAGCGCATCGCGTGGGTGCTGGACTCGGGCATTACCAACTTCCTGGAGCAACCGATTAAGCGCTGCCCGCCGAAGGTGTATGCCTTCAACTTGAGCAATGACAAGACGGTCAAGACGATCGACCTGTCGGAGATTGTGAAATCCAGCTCAACTTTATTATACAAAGTTGTGGCGCGCCCCCCAACTGGGGTAACCTTTGGGCTCCCCGGGCGCGTACTCCACCTCACCCATGG…
H_left	H_left_3	AGAP005958	9.97616	GCGCACATTAAGCCGTACCCTTGCTGGGCCTATCAGGAGGAGGGCAATTGCAACTCGCTCCAATCCGTCATCGATCTGTACGTGGATGTGAAGGTACGTTGTGTTACCGGGGCCATTGGTTTTGCGGTAGGATGAAAACGTTGCTAACGTGTTGTCTCTTTCCTTGCAGCGCATCGCGTGGGTGCTGGACTCGGGCATTACCAACTTCCTGGAGCAACCGATTAAGCGCTGCCCGCCGAAGGTGTATGCCTTCAACTTGAGCAATGACAAGACGGTCAAGACGATCGATCTGTCGGAGATTGTGAAATCCAGCTCAACTTTATTATACAAAGTTGTGGCGCGCCCCCCAACTGGGGTAACCTTTGGGCTCCCCGGGCGCGTACTCCACCTCACCCATGG…
H_left	H_left_4	AGAP005958	2.14161	GCGCACATTAAGCCGTACCCTTGCTGGGCCTATCAGGAGGAGGGCAATTGCAACTCGCTCCAATCCGTCATCGATCTGTACGTGGATGTGAAGGTACGTTGTGTTACCGGGGCCATTGGTTTTGCGGTAGGATGAAAACGTTGCTAACGTGTTGTCTCTTTCCTTGCAGCGCATCGCGTGGGTGCTGGACTCGGGCATTACCAACTTCCTGGAGCAACCGATTAAGCGCTGCCCGCCGAAGGTGTATGCCTTCAACTTGAGCAACGACAAGACGGTCAAGACGATCGACCTGTCGGAGATTGTGAAATCCAGCTCAACTTTATTATACAAAGTTGTGGCGCGCCCCCCAACTGGGGTAACCTTTGGGCTCCCCGGGCGCGTACTCCACCTCACCCATGG…
H_left	H_left_6	AGAP005958	1.7705	GCGCACATTAAGCCGTACCCTTGCTGGGCCTATCAGGAGGAGGGCAATTGCAACTCGCTCCAATCCGTCATCGATCTGTACGTGGATGTGAAGGTACGTTGTGTTACCGGGGCCATTGGTTTTGCGGTAGGATGAAAACGTTGCTAACGTGTTGTCTCTTTCCTTGCAGCGCATCGCGTGGGTGCTGGACTCGGGCATCACCAACTTCCTGGAGCAACCGATCAAGCGCTGCCCGCCGAAGGTGTATGCCTTCAACTTGAGCAACGACAAGACGGTCAAGACGATCGACCTGTCGGAGATTGTGAAATCCAGCTCAACTTTATTATACAAAGTTGTGGCGCGCCCCCCAACTGGGGTAACCTTTGGGCTCCCCGGGCGCGTACTCCACCTCACCCATGG…
H_left	H_left_7	AGAP005958	1.57289	GCGCACATTAAGCCGTACCCTTGCTGGGCCTATCAGGAGGAGGGCAATTGCAACTCGCTCCAATCCGTCATCGATCTGTACGTGGATGTGAAGGTACGTTGTGTTACCGTGGCCACCGTGCTTTTGCGGTAGGATGAAAACGTGCTAACGTGTCGTCTCTTTCCTTGCAGCGCATCGCGTGGGTGCTGGACTCGGGCATCACCAACTTCCTGGAGCAACCGATCAAGCGCTGCCCGCCGAAGGTGTATGCCTTCAACTTGAGCAATGACAAGACGGTCAAGACGATCGACCTGTCGGAGATTGTGAAATCCAGCTCAACTTTATTATACAAAGTTGTGGCGCGCCCCCCAACTGGGGTAACCTTTGGGCTCCCCGGGCGCGTACTCCACCTCACCCATG…
H_left	H_left_8	AGAP005958	1.28623	GCGCACATTAAGCCGTACCCTTGCTGGGCCTATCAGGAGGAGGGCAATTGCAACTCGCTCCAATCCGTCATCGATCTGTACGTGGATGTGAAGGTACGTTGTGTTACCGTGGCCACCGTGCTTTTGCGGTAGGATGAAAACGTGCTAACGTGTCGTCTCTTTCCTTGCAGCGCATCGCGTGGGTGCTGGACTCGGGCATCACCAACTTCCTGGAGCAACCGATCAAGCGCTGCCCGCCGAAGGTGTATGCCTTCAACTTGAGCAATGACAAGACGGTCAAGACGATCGATCTGTCGGAGATTGTGAAATCCAGCTCAACTTTATTATACAAAGTTGTGGCGCGCCCCCCAACTGGGGTAACCTTTGGGCTCCCCGGGCGCGTACTCCACCTCACCCATG…
H_left	H_left_9	AGAP005958	1.12767	GCGCACATTAAGCCGTACCCTTGCTGGGCCTATCAGGAGGAGGGCAATTGCAACTCGCTCCAATCCGTCATCGATCTGTACGTGGATGTGAAGGTACGTTGTGTTACCGGGGCCATTGGTTTTGCGGTAGGATGAAAACGTTGCTAACGTGTTGTCTCTTTCCTTGCAGCGCATCGCGTGGGTGCTGGACTCGGGCATTACCAACTTCCTGGAGCAACCGATCAAGCGCTGCCCGCCGAAGGTGTATGCCTTCAACTTGAGCAACGACAAGACGGTCAAGACGATCGACCTGTCGGAGATTGTGAAATCCAGCTCAACTTTATTATACAAAGTTGTGGCGCGCCCCCCAACTGGGGTAACCTTTGGGCTCCCCGGGCGCGTACTCCACCTCACCCATGG…
H_left	H_left_10	AGAP005958	1.04438	GCGCACATTAAGCCGTACCCTTGCTGGGCCTATCAGGAGGAGGGCAATTGCAACTCGCTCCAATCCGTCATCGATCTGTACGTGGATGTGAAGGTACGTTGTGTTACCGGGGCCATTGGTTTTGCGGTAGGATGAAAACGTGCTAACGTGTCGTCTCTTTCCTTGCAGCGCATCGCGTGGGTGCTGGACTCGGGCATCACCAACTTCCTGGAGCAACCGATCAAGCGCTGCCCGCCGAAGGTGTATGCCTTCAACTTGAGCAACGACAAGACGGTCAAGACGATCGACCTGTCGGAGATTGTGAAATCCAGCTCAACTTTATTATACAAAGTTGTGGCGCGCCCCCCAACTGGGGTAACCTTTGGGCTCCCCGGGCGCGTACTCCACCTCACCCATGGG…
H_left	H_left_12	AGAP005958	0.984059	GCGCACATTAAGCCGTACCCTTGCTGGGCCTATCAGGAGGAGGGCAATTGCAACTCGCTCCAATCCGTCATCGATCTGTACGTGGATGTGAAGGTACGTTGTGTTACCGTGGCCACCGTGCTTTTGCGGTAGGATGAAAACGTGCTAACGTGTCGTCTCTTTCCTTGCAGCGCATCGCGTGGGTGCTGGACTCGGGCATTACCAACTTCCTGGAGCAACCGATTAAGCGCTGCCCGCCGAAGGTGTATGCCTTCAACTTGAGCAATGACAAGACGGTCAAGACGATCGACCTGTCGGAGATTGTGAAATCCAGCTCAACTTTATTATACAAAGTTGTGGCGCGCCCCCCAACTGGGGTAACCTTTGGGCTCCCCGGGCGCGTACTCCACCTCACCCATG…
H_left	H_left_13	AGAP005958	0.844464	GCGCACATTAAGCCGTACCCTTGCTGGGCCTATCAGGAGGAGGGCAATTGCAACTCGCTCCAATCCGTCATCGATCTGTACGTGGATGTGAAGGTACGTTGTGTTACCGTGGCCACCGTGCTTTTGCGGTAGGATGAAAACGTGCTAACGTGTCGTCTCTTTCCTTGCAGCGCATCGCGTGGGTGCTGGACTCGGGCATTACCAACTTCCTGGAGCAACCGATTAAGCGCTGCCCGCCGAAGGTGTATGCCTTCAACTTGAGCAATGACAAGACGGTCAAGACGATCGATCTGTCGGAGATTGTGAAATCCAGCTCAACTTTATTATACAAAGTTGTGGCGCGCCCCCCAACTGGGGTAACCTTTGGGCTCCCCGGGCGCGTACTCCACCTCACCCATG…
H_left	H_left_15	AGAP005958	0.764038	GCGCACATTAAGCCGTACCCTTGCTGGGCCTATCAGGAGGAGGGCAATTGCAACTCGCTCCAATCCGTCATCGATCTGTACGTGGATGTGAAGGTACGTTGTGTTACCGTGGCCACCGTGCTTTTGCGGTAGGATGAAAACGTGCTAACGTGTCGTCTCTTTCCTTGCAGCGCATCGCGTGGGTGCTGGACTCGGGCATCACCAACTTCCTGGAGCAACCGATTAAGCGCTGCCCGCCGAAGGTGTATGCCTTCAACTTGAGCAATGACAAGACGGTCAAGACGATCGACCTGTCGGAGATTGTGAAATCCAGCTCAACTTTATTATACAAAGTTGTGGCGCGCCCCCCAACTGGGGTAACCTTTGGGCTCCCCGGGCGCGTACTCCACCTCACCCATG…
H_left	H_left_17	AGAP005958	0.595146	GCGCACATTAAGCCGTACCCTTGCTGGGCCTATCAGGAGGAGGGCAATTGCAACTCGCTCCAATCCGTCATCGATCTGTACGTGGATGTGAAGGTACGTTGTGTTACCGTGGCCACCGTGCTTTTGCGGTAGGATGAAAACGTGCTAACGTGTCGTCTCTTTCCTTGCAGCGCATCGCGTGGGTGCTGGACTCGGGCATCACCAACTTCCTGGAGCAACCGATCAAGCGCTGCCCGCCGAAGGTGTATGCCTTCAACTTGAGCAACGACAAGACGGTCAAGACGATCGATCTGTCGGAGATTGTGAAATCCAGCTCAACTTTATTATACAAAGTTGTGGCGCGCCCCCCAACTGGGGTAACCTTTGGGCTCCCCGGGCGCGTACTCCACCTCACCCATG…
H_left	H_left_18	AGAP005958	0.586529	GCGCACATTAAGCCGTACCCTTGCTGGGCCTATCAGGAGGAGGGCAATTGCAACTCGCTCCAATCCGTCATCGATCTGTACGTGGATGTGAAGGTACGTTGTGTTACCGTGGCCACCGTGCTTTTGCGGTAGGATGAAAACGTGCTAACGTGTCGTCTCTTTCCTTGCAGCGCATCGCGTGGGTGCTGGACTCGGGCATCACCAACTTCCTGGAGCAACCGATTAAGCGCTGCCCGCCGAAGGTGTATGCCTTCAACTTGAGCAATGACAAGACGGTCAAGACGATCGATCTGTCGGAGATTGTGAAATCCAGCTCAACTTTATTATACAAAGTTGTGGCGCGCCCCCCAACTGGGGTAACCTTTGGGCTCCCCGGGCGCGTACTCCACCTCACCCATG…
H_left	H_left_19	AGAP005958	0.500934	GCGCACATTAAGCCGTACCCTTGCTGGGCCTATCAGGAGGAGGGCAATTGCAACTCGCTCCAATCCGTCATCGATCTGTACGTGGATGTGAAGGTACGTTGTGTTACCGGGGCCATTGGTTTTGCGGTAGGATGAAAACGTTGCTAACGTGTCGTCTCTTTCCTTGCAGCGCATCGCGTGGGTGCTGGACTCGGGCATCACCAACTTCCTGGAGCAACCGATCAAGCGCTGCCCGCCGAAGGTGTATGCCTTCAACTTGAGCAACGACAAGACGGTCAAGACGATCGACCTGTCGGAGATTGTGAAATCCAGCTCAACTTTATTATACAAAGTTGTGGCGCGCCCCCCAACTGGGGTAACCTTTGGGCTCCCCGGGCGCGTACTCCACCTCACCCATGG…
H_right	H_right_1	AGAP005958	17.7232	CAATGTATCTTTCCGGAGCGATCGCATGGGTGAGGTGGAGTACGCGCCCGGGGAGCCCAAAGGTTACCCCAGTTGGGGGGCGCGCCCAACTTTGTATAGAAAAGTTGGGTGCGCGGCTCCAGTATCTCGTCACTGATTACAACGAGCTCGGCCATCCGTTTGTGTAAGTATTGTGTTGGGTAAAGCCTGCAAAGTAAAATCACGTGCGTGATGCTAACGATCTCCCAACTTGCAGCTACATTTCCGATGGCGATGGTGCAATCATTGTGCTGGACGTGAACAACAACAAGAGCTTCCGCGTGGTACTACCGCGTGCCATCTCGGCTGGCTGCGGCGATTCGGACGTGCTCTACCTGCTGCTCATCCCGAAACCGAAGGGCCAGAGCCTGGTGATCTTCA…
H_right	H_right_2	AGAP005958	14.7542	CAATGTATCTTTCCGGAGCGATCGCATGGGTGAGGTGGAGTACGCGCCCGGGGAGCCCAAAGGTTACCCCAGTTGGGGGGCGCGCCCAACTTTGTATAGAAAAGTTGGGTGCGCGGCTCCAGTATCTCGTCACTGATTACAACGAGCTCGGCCATCCGTTTGTGTAAGTATTGCGTTGGGTAAAACCTACAAAGTAAAATCACGTGCGTGAAGCTAACGATCTCCACGACTTGCAGTTACATTTCCGACGGCGATGGTGCAATCATTGTGCTGGACGTGAACAACAACAAGAGCTTCCGCGTGGTGCTACCGCGTGCCATCTCGGCTGGCTGCGGCGATTCAGATGTGCTTTACCTGCTGCTCATCCCGAAACCGAAGGGCCAGAGCCTGGTGATCTTC…
H_right	H_right_6	AGAP005958	1.95705	CAATGTATCTTTCCGGAGCGATCGCATGGGTGAGGTGGAGTACGCGCCCGGGGAGCCCAAAGGTTACCCCAGTTGGGGGGCGCGCCCAACTTTGTATAGAAAAGTTGGGTGCGCGGCTCCAGTATCTCGTCACTGATTACAACGAGCTCGGCCATCCGTTTGTGTAAGTATTGTGTTGGGTAAAGCCTGCAAAGTAAAATCACGTGCGTGATGCTAACGATCTCCCAACTTGCAGCTACATTTCCGATGGCGATGGTGCAATCATTGTGCTGGACGTGAACAACAACAAGAGCTTCCGCGTGGTGCTACCGCGTGCCATCTCGGCTGGCTGCGGCGATTCAGATGTGCTTTACCTGCTGCTCATCCCGAAACCGAAGGGCCAGAGCCTGGTGATCTTCA…
H_right	H_right_7	AGAP005958	1.67113	CAATGTATCTTTCCGGAGCGATCGCATGGGTGAGGTGGAGTACGCGCCCGGGGAGCCCAAAGGTTACCCCAGTTGGGGGGCGCGCCCAACTTTGTATAGAAAAGTTGGGTGCGCGGCTCCAGTATCTCGTCACTGATTACAACGAGCTCGGCCATCCGTTTGTGTAAGTATTGCGTTGGGTAAAACCTACAAAGTAAAATCACGTGCGTGAAGCTAACGATCTCCACGACTTGCAGTTACATTTCCGACGGCGATGGTGCAATCATTGTGCTGGACGTGAACAACAACAAGAGCTTCCGCGTGGTACTACCGCGTGCCATCTCGGCTGGCTGCGGCGATTCGGACGTGCTCTACCTGCTGCTCATCCCGAAACCGAAGGGCCAGAGCCTGGTGATCTTC…
H_right	H_right_8	AGAP005958	1.27638	CAATGTATCTTTCCGGAGCGATCGCATGGGTGAGGTGGAGTACGCGCCCGGGGAGCCCAAAGGTTACCCCAGTTGGGGGGCGCGCCCAACTTTGTATAGAAAAGTTGGGTGCGCGGCTCCAGTATCTCGTCACTGATTACAACGAGCTCGGCCATCCGTTTGTGTAAGTATTGCGTTGGGTAAAACCTACAAAGTAAAATCACGTGCGTGAAGCTAACGATCTCCACGACTTGCAGTTACATTTCCGACGGCGATGGTGCAATCATTGTGCTGGACGTGAACAACAACAAGAGCTTCCGCGTGGTGCTACCGCGTGCCATCTCGGCTGGCTGCGGCGATTCGGACGTGCTCTACCTGCTGCTCATCCCGAAACCGAAGGGCCAGAGCCTGGTGATCTTC…
H_right	H_right_9	AGAP005958	1.0506	CAATGTATCTTTCCGGAGCGATCGCATGGGTGAGGTGGAGTACGCGCCCGGGGAGCCCAAAGGTTACCCCAGTTGGGGGGCGCGCCCAACTTTGTATAGAAAAGTTGGGTGCGCGGCTCCAGTATCTCGTCACTGATTACAACGAGCTCGGCCATCCGTTTGTGTAAGTATTGTGTTGGGTAAAGCCTGCAAAGTAAAATCACGTGCGTGATGCTAACGATCTCCCAACTTGCAGCTACATTTCCGATGGCGATGGTGCAATCATTGTGCTGGACGTGAACAACAACAAGAGCTTCCGCGTGGTGCTACCGCGTGCCATCTCGGCTGGCTGCGGCGATTCGGACGTGCTCTACCTGCTGCTCATCCCGAAACCGAAGGGCCAGAGCCTGGTGATCTTCA…
H_right	H_right_12	AGAP005958	0.83819	CAATGTATCTTTCCGGAGCGATCGCATGGGTGAGGTGGAGTACGCGCCCGGGGAGCCCAAAGGTTACCCCAGTTGGGGGGCGCGCCCAACTTTGTATAGAAAAGTTGGGTGCGCGGCTCCAGTATCTCGTCACTGATTACAACGAGCTCGGCCATCCGTTTGTGTAAGTATTGTGTTGGGTAAAGCCTGCAAAGTAAAATCACGTGCGTGATGCTAACGATCTCCCAACTTGCAGCTACATTTCCGATGGCGATGGTGCAATCATTGTGCTGGACGTGAACAACAACAAGAGCTTCCGCGTGGTACTACCGCGTGCCATCTCGGCTGGCTGCGGCGATTCAGATGTGCTTTACCTGCTGCTCATCCCGAAACCGAAGGGCCAGAGCCTGGTGATCTTCA…
H_right	H_right_13	AGAP005958	0.709789	CAATGTATCTTTCCGGAGCGATCGCATGGGTGAGGTGGAGTACGCGCCCGGGGAGCCCAAAGGTTACCCCAGTTGGGGGGCGCGCCCAACTTTGTATAGAAAAGTTGGGTGCGCGGCTCCAGTATCTCGTCACTGATTACAACGAGCTCGGCCATCCGTTTGTGTAAGTATTGTGTTGGGTAAAGCCTGCAAAGTAAAATCACGTGCGTGAAGCTAACGATCTCCACGACTTGCAGTTACATTTCCGACGGCGATGGTGCAATCATTGTGCTGGACGTGAACAACAACAAGAGCTTCCGCGTGGTGCTACCGCGTGCCATCTCGGCTGGCTGCGGCGATTCAGATGTGCTTTACCTGCTGCTCATCCCGAAACCGAAGGGCCAGAGCCTGGTGATCTTC…
H_right	H_right_14	AGAP005958	0.57184	CAATGTATCTTTCCGGAGCGATCGCATGGGTGAGGTGGAGTACGCGCCCGGGGAGCCCAAAGGTTACCCCAGTTGGGGGGCGCGCCCAACTTTGTATAGAAAAGTTGGGTGCGCGGCTCCAGTATCTCGTCACTGATTACAACGAGCTCGGCCATCCGTTTGTGTAAGTATTGCGTTGGGTAAAACCTACAAAGTAAAATCACGTGCGTGATGCTAACGATCTCCCAACTTGCAGCTACATTTCCGATGGCGATGGTGCAATCATTGTGCTGGACGTGAACAACAACAAGAGCTTCCGCGTGGTACTACCGCGTGCCATCTCGGCTGGCTGCGGCGATTCGGACGTGCTCTACCTGCTGCTCATCCCGAAACCGAAGGGCCAGAGCCTGGTGATCTTCA…
I_left	I_left_1	AGAP005958	23.8233	GCGCACATTAAGCCGTACCCTTGCTGGGCCTATCAGGAGGAGGGCAATTGCAACTCGCTCCAATCCGTCATCGATCTGTACGTGGATGTGAAGGTACGTTGTGTTACCGGGGCCATTGGTTTTGCGGTAGGATGAAAACGTTGCTAACGTGTTGTCTCTTTCCTTGCAGCGCATCGCGTGGGTGCTGGACTCGGGCATTACCAACTTCCTGGAGCAACCGATTAAGCGCTGCCCGCCGAAGGTGTATGCCTTCAACTTGAGCAATGACAAGACGGTCAAGACGATCGATCTGTCGGAGATTGTGAAATCCAGCTCAACTTTATTATACAAAGTTGTGGCGCGCCCCCCAACTGGGGTAACCTTTGGGCTCCCCGGGCGCGTACTCCACCTCACCCATGG…
I_left	I_left_2	AGAP005958	20.6046	GCGCACATTAAGCCGTACCCTTGCTGGGCCTATCAGGAGGAGGGCAATTGCAACTCGCTCCAATCCGTCATCGATCTGTACGTGGATGTGAAGGTACGTTGTGTTACCGTGGCCACCGTGCTTTTGCGGTAGGATGAAAACGTGCTAACGTGTCGTCTCTTTCCTTGCAGCGCATCGCGTGGGTGCTGGACTCGGGCATCACCAACTTCCTGGAGCAACCGATCAAGCGCTGCCCGCCGAAGGTGTATGCCTTCAACTTGAGCAACGACAAGACGGTCAAGACGATCGACCTGTCGGAGATTGTGAAATCCAGCTCAACTTTATTATACAAAGTTGTGGCGCGCCCCCCAACTGGGGTAACCTTTGGGCTCCCCGGGCGCGTACTCCACCTCACCCATG…
I_left	I_left_3	AGAP005958	2.42299	GCGCACATTAAGCCGTACCCTTGCTGGGCCTATCAGGAGGAGGGCAATTGCAACTCGCTCCAATCCGTCATCGATCTGTACGTGGATGTGAAGGTACGTTGTGTTACCGTGGCCACCGTGCTTTTGCGGTAGGATGAAAACGTGCTAACGTGTCGTCTCTTTCCTTGCAGCGCATCGCGTGGGTGCTGGACTCGGGCATCACCAACTTCCTGGAGCAACCGATCAAGCGCTGCCCGCCGAAGGTGTATGCCTTCAACTTGAGCAATGACAAGACGGTCAAGACGATCGATCTGTCGGAGATTGTGAAATCCAGCTCAACTTTATTATACAAAGTTGTGGCGCGCCCCCCAACTGGGGTAACCTTTGGGCTCCCCGGGCGCGTACTCCACCTCACCCATG…
I_left	I_left_5	AGAP005958	1.64607	GCGCACATTAAGCCGTACCCTTGCTGGGCCTATCAGGAGGAGGGCAATTGCAACTCGCTCCAATCCGTCATCGATCTGTACGTGGATGTGAAGGTACGTTGTGTTACCGTGGCCACCGTGCTTTTGCGGTAGGATGAAAACGTGCTAACGTGTCGTCTCTTTCCTTGCAGCGCATCGCGTGGGTGCTGGACTCGGGCATTACCAACTTCCTGGAGCAACCGATTAAGCGCTGCCCGCCGAAGGTGTATGCCTTCAACTTGAGCAATGACAAGACGGTCAAGACGATCGATCTGTCGGAGATTGTGAAATCCAGCTCAACTTTATTATACAAAGTTGTGGCGCGCCCCCCAACTGGGGTAACCTTTGGGCTCCCCGGGCGCGTACTCCACCTCACCCATG…
I_left	I_left_6	AGAP005958	1.63466	GCGCACATTAAGCCGTACCCTTGCTGGGCCTATCAGGAGGAGGGCAATTGCAACTCGCTCCAATCCGTCATCGATCTGTACGTGGATGTGAAGGTACGTTGTGTTACCGGGGCCATTGGTTTTGCGGTAGGATGAAAACGTTGCTAACGTGTTGTCTCTTTCCTTGCAGCGCATCGCGTGGGTGCTGGACTCGGGCATTACCAACTTCCTGGAGCAACCGATTAAGCGCTGCCCGCCGAAGGTGTATGCCTTCAACTTGAGCAACGACAAGACGGTCAAGACGATCGACCTGTCGGAGATTGTGAAATCCAGCTCAACTTTATTATACAAAGTTGTGGCGCGCCCCCCAACTGGGGTAACCTTTGGGCTCCCCGGGCGCGTACTCCACCTCACCCATGG…
I_left	I_left_7	AGAP005958	1.57417	GCGCACATTAAGCCGTACCCTTGCTGGGCCTATCAGGAGGAGGGCAATTGCAACTCGCTCCAATCCGTCATCGATCTGTACGTGGATGTGAAGGTACGTTGTGTTACCGGGGCCATTGGTTTTGCGGTAGGATGAAAACGTTGCTAACGTGTTGTCTCTTTCCTTGCAGCGCATCGCGTGGGTGCTGGACTCGGGCATCACCAACTTCCTGGAGCAACCGATCAAGCGCTGCCCGCCGAAGGTGTATGCCTTCAACTTGAGCAACGACAAGACGGTCAAGACGATCGACCTGTCGGAGATTGTGAAATCCAGCTCAACTTTATTATACAAAGTTGTGGCGCGCCCCCCAACTGGGGTAACCTTTGGGCTCCCCGGGCGCGTACTCCACCTCACCCATGG…
I_left	I_left_9	AGAP005958	1.13588	GCGCACATTAAGCCGTACCCTTGCTGGGCCTATCAGGAGGAGGGCAATTGCAACTCGCTCCAATCCGTCATCGATCTGTACGTGGATGTGAAGGTACGTTGTGTTACCGTGGCCACCGTGCTTTTGCGGTAGGATGAAAACGTGCTAACGTGTCGTCTCTTTCCTTGCAGCGCATCGCGTGGGTGCTGGACTCGGGCATCACCAACTTCCTGGAGCAACCGATTAAGCGCTGCCCGCCGAAGGTGTATGCCTTCAACTTGAGCAATGACAAGACGGTCAAGACGATCGATCTGTCGGAGATTGTGAAATCCAGCTCAACTTTATTATACAAAGTTGTGGCGCGCCCCCCAACTGGGGTAACCTTTGGGCTCCCCGGGCGCGTACTCCACCTCACCCATG…
I_left	I_left_10	AGAP005958	1.1225	GCGCACATTAAGCCGTACCCTTGCTGGGCCTATCAGGAGGAGGGCAATTGCAACTCGCTCCAATCCGTCATCGATCTGTACGTGGATGTGAAGGTACGTTGTGTTACCGTGGCCACCGTGCTTTTGCGGTAGGATGAAAACGTGCTAACGTGTCGTCTCTTTCCTTGCAGCGCATCGCGTGGGTGCTGGACTCGGGCATCACCAACTTCCTGGAGCAACCGATCAAGCGCTGCCCGCCGAAGGTGTATGCCTTCAACTTGAGCAACGACAAGACGGTCAAGACGATCGATCTGTCGGAGATTGTGAAATCCAGCTCAACTTTATTATACAAAGTTGTGGCGCGCCCCCCAACTGGGGTAACCTTTGGGCTCCCCGGGCGCGTACTCCACCTCACCCATG…
I_left	I_left_11	AGAP005958	0.993589	GCGCACATTAAGCCGTACCCTTGCTGGGCCTATCAGGAGGAGGGCAATTGCAACTCGCTCCAATCCGTCATCGATCTGTACGTGGATGTGAAGGTACGTTGTGTTACCGGGGCCATTGGTTTTGCGGTAGGATGAAAACGTTGCTAACGTGTTGTCTCTTTCCTTGCAGCGCATCGCGTGGGTGCTGGACTCGGGCATTACCAACTTCCTGGAGCAACCGATTAAGCGCTGCCCGCCGAAGGTGTATGCCTTCAACTTGAGCAATGACAAGACGGTCAAGACGATCGACCTGTCGGAGATTGTGAAATCCAGCTCAACTTTATTATACAAAGTTGTGGCGCGCCCCCCAACTGGGGTAACCTTTGGGCTCCCCGGGCGCGTACTCCACCTCACCCATGG…
I_left	I_left_12	AGAP005958	0.968303	GCGCACATTAAGCCGTACCCTTGCTGGGCCTATCAGGAGGAGGGCAATTGCAACTCGCTCCAATCCGTCATCGATCTGTACGTGGATGTGAAGGTACGTTGTGTTACCGGGGCCATTGGTTTTGCGGTAGGATGAAAACGTGCTAACGTGTCGTCTCTTTCCTTGCAGCGCATCGCGTGGGTGCTGGACTCGGGCATCACCAACTTCCTGGAGCAACCGATCAAGCGCTGCCCGCCGAAGGTGTATGCCTTCAACTTGAGCAACGACAAGACGGTCAAGACGATCGACCTGTCGGAGATTGTGAAATCCAGCTCAACTTTATTATACAAAGTTGTGGCGCGCCCCCCAACTGGGGTAACCTTTGGGCTCCCCGGGCGCGTACTCCACCTCACCCATGGG…
I_left	I_left_13	AGAP005958	0.965824	GCGCACATTAAGCCGTACCCTTGCTGGGCCTATCAGGAGGAGGGCAATTGCAACTCGCTCCAATCCGTCATCGATCTGTACGTGGATGTGAAGGTACGTTGTGTTACCGGGGCCATTGGTTTTGCGGTAGGATGAAAACGTTGCTAACGTGTTGTCTCTTTCCTTGCAGCGCATCGCGTGGGTGCTGGACTCGGGCATTACCAACTTCCTGGAGCAACCGATCAAGCGCTGCCCGCCGAAGGTGTATGCCTTCAACTTGAGCAACGACAAGACGGTCAAGACGATCGACCTGTCGGAGATTGTGAAATCCAGCTCAACTTTATTATACAAAGTTGTGGCGCGCCCCCCAACTGGGGTAACCTTTGGGCTCCCCGGGCGCGTACTCCACCTCACCCATGG…
I_left	I_left_16	AGAP005958	0.573148	GCGCACATTAAGCCGTACCCTTGCTGGGCCTATCAGGAGGAGGGCAATTGCAACTCGCTCCAATCCGTCATCGATCTGTACGTGGATGTGAAGGTACGTTGTGTTACCGTGGCCACCGTGCTTTTGCGGTAGGATGAAAACGTTGCTAACGTGTTGTCTCTTTCCTTGCAGCGCATCGCGTGGGTGCTGGACTCGGGCATTACCAACTTCCTGGAGCAACCGATTAAGCGCTGCCCGCCGAAGGTGTATGCCTTCAACTTGAGCAATGACAAGACGGTCAAGACGATCGATCTGTCGGAGATTGTGAAATCCAGCTCAACTTTATTATACAAAGTTGTGGCGCGCCCCCCAACTGGGGTAACCTTTGGGCTCCCCGGGCGCGTACTCCACCTCACCCAT…
I_right	I_right_1	AGAP005958	19.3979	CAATGTATCTTTCCGGAGCGATCGCATGGGTGAGGTGGAGTACGCGCCCGGGGAGCCCAAAGGTTACCCCAGTTGGGGGGCGCGCCCAACTTTGTATAGAAAAGTTGGGTGCGCGGCTCCAGTATCTCGTCACTGATTACAACGAGCTCGGCCATCCGTTTGTGTAAGTATTGCGTTGGGTAAAACCTACAAAGTAAAATCACGTGCGTGAAGCTAACGATCTCCACGACTTGCAGTTACATTTCCGACGGCGATGGTGCAATCATTGTGCTGGACGTGAACAACAACAAGAGCTTCCGCGTGGTGCTACCGCGTGCCATCTCGGCTGGCTGCGGCGATTCAGATGTGCTTTACCTGCTGCTCATCCCGAAACCGAAGGGCCAGAGCCTGGTGATCTTC…
I_right	I_right_2	AGAP005958	16.5222	CAATGTATCTTTCCGGAGCGATCGCATGGGTGAGGTGGAGTACGCGCCCGGGGAGCCCAAAGGTTACCCCAGTTGGGGGGCGCGCCCAACTTTGTATAGAAAAGTTGGGTGCGCGGCTCCAGTATCTCGTCACTGATTACAACGAGCTCGGCCATCCGTTTGTGTAAGTATTGTGTTGGGTAAAGCATGCAAAGTAAAATCACGTGCGTGATGCTAACGATCTCCCAACTTGCAGCTACATTTCCGATGGCGATGGTGCAATCATTGTGCTGGACGTGAACAACAACAAGAGCTTCCGCGTGGTGCTACCGCGTGCCATCTCGGCTGGCTGCGGCGATTCGGACGTGCTCTACCTGCTGCTCATCCCGAAACCGAAGGGCCAGAGCCTGGTGATCTTCA…
I_right	I_right_4	AGAP005958	4.47737	CAATGTATCTTTCCGGAGCGATCGCATGGGTGAGGTGGAGTACGCGCCCGGGGAGCCCAAAGGTTACCCCAGTTGGGGGGCGCGCCCAACTTTGTATAGAAAAGTTGGGTGCGCGGCTCCAGTATCTCGTCACTGATTACAACGAGCTCGGCCATCCGTTTGTGTAAGTATTGTGTTGGGTAAAGCATGCAAAGTAAAATCACGTGCGTGATGCTAACGATCTCCCAACTTGCAGCTACATTTCCGATGGCGATGGTGCAATCATTGTGCTGGACGTGAACAACAACAAGAGCTTCCGCGTGGTGCTACCGCGTGCCATCTCGGCTGGCTGCGGCGATTCAGATGTGCTTTACCTGCTGCTCATCCCGAAACCGAAGGGCCAGAGCCTGGTGATCTTCA…
I_right	I_right_5	AGAP005958	3.1045	CAATGTATCTTTCCGGAGCGATCGCATGGGTGAGGTGGAGTACGCGCCCGGGGAGCCCAAAGGTTACCCCAGTTGGGGGGCGCGCCCAACTTTGTATAGAAAAGTTGGGTGCGCGGCTCCAGTATCTCGTCACTGATTACAACGAGCTCGGCCATCCGTTTGTGTAAGTATTGCGTTGGGTAAAACCTACAAAGTAAAATCACGTGCGTGAAGCTAACGATCTCCACGACTTGCAGTTACATTTCCGACGGCGATGGTGCAATCATTGTGCTGGACGTGAACAACAACAAGAGCTTCCGCGTGGTGCTACCGCGTGCCATCTCGGCTGGCTGCGGCGATTCGGACGTGCTCTACCTGCTGCTCATCCCGAAACCGAAGGGCCAGAGCCTGGTGATCTTC…
I_right	I_right_7	AGAP005958	0.957551	CAATGTATCTTTCCGGAGCGATCGCATGGGTGAGGTGGAGTACGCGCCCGGGGAGCCCAAAGGTTACCCCAGTTGGGGGGCGCGCCCAACTTTGTATAGAAAAGTTGGGTGCGCGGCTCCAGTATCTCGTCACTGATTACAACGAGCTCGGCCATCCGTTTGTGTAAGTATTGTGTTGGGTAAAGCATGCAAAGTAAAATCACGTGCGTGAAGCTAACGATCTCCACGACTTGCAGTTACATTTCCGACGGCGATGGTGCAATCATTGTGCTGGACGTGAACAACAACAAGAGCTTCCGCGTGGTGCTACCGCGTGCCATCTCGGCTGGCTGCGGCGATTCAGATGTGCTTTACCTGCTGCTCATCCCGAAACCGAAGGGCCAGAGCCTGGTGATCTTC…
I_right	I_right_15	AGAP005958	0.584332	CAATGTATCTTTCCGGAGCGATCGCATGGGTGAGGTGGAGTACGCGCCCGGGGAGCCCAAAGGTTACCCCAGTTGGGGGGCGCGCCCAACTTTGTATAGAAAAGTTGGGTGCGCGGCTCCAGTATCTCGTCACTGATTACAACGAGCTCGGCCATCCGTTTGTGTAAGTATTGCGTTGGGTAAAACCTACAAAGTAAAATCACGTGCGTGATGCTAACGATCTCCCAACTTGCAGCTACATTTCCGATGGCGATGGTGCAATCATTGTGCTGGACGTGAACAACAACAAGAGCTTCCGCGTGGTGCTACCGCGTGCCATCTCGGCTGGCTGCGGCGATTCGGACGTGCTCTACCTGCTGCTCATCCCGAAACCGAAGGGCCAGAGCCTGGTGATCTTCA…
J_left	J_left_1	AGAP005958	23.1183	GCGCACATTAAGCCGTACCCTTGCTGGGCCTATCAGGAGGAGGGCAATTGCAACTCGCTCCAATCCGTCATCGATCTGTACGTGGATGTGAAGGTACGTTGTGTTACCGGGGCCATTGGTTTTGCGGTAGGATGAAAACGTTGCTAACGTGTTGTCTCTTTCCTTGCAGCGCATCGCGTGGGTGCTGGACTCGGGCATTACCAACTTCCTGGAGCAACCGATTAAGCGCTGCCCGCCGAAGGTGTATGCCTTCAACTTGAGCAATGACAAGACGGTCAAGACGATCGACCTGTCGGAGATTGTGAAATCCAGCTCAACTTTATTATACAAAGTTGTGGCGCGCCCCCCAACTGGGGTAACCTTTGGGCTCCCCGGGCGCGTACTCCACCTCACCCATGG…
J_left	J_left_2	AGAP005958	20.8526	GCGCACATTAAGCCGTACCCTTGCTGGGCCTATCAGGAGGAGGGCAATTGCAACTCGCTCCAATCCGTCATCGATCTGTACGTGGATGTGAAGGTACGTTGTTGTGTTACCGTGGCCACCGTGCTTTTGCGGTAGGATGAAAACATGCTAACGTGTCGTCTCTTTCCTTGCAGCGCATCGCGTGGGTGCTGGACTCGGGCATCACCAACTTCCTGGAGCAACCGATCAAGCGCTGCCCGCCGAAGGTGTATGCCTTCAACTTGAGCAACGACAAGACGGTCAAGACGATCGACCTGTCGGAGATTGTGAAATCCAGCTCAACTTTATTATACAAAGTTGTGGCGCGCCCCCCAACTGGGGTAACCTTTGGGCTCCCCGGGCGCGTACTCCACCTCACCC…
J_left	J_left_3	AGAP005958	2.02582	GCGCACATTAAGCCGTACCCTTGCTGGGCCTATCAGGAGGAGGGCAATTGCAACTCGCTCCAATCCGTCATCGATCTGTACGTGGATGTGAAGGTACGTTGTTGTGTTACCGTGGCCACCGTGCTTTTGCGGTAGGATGAAAACATGCTAACGTGTCGTCTCTTTCCTTGCAGCGCATCGCGTGGGTGCTGGACTCGGGCATCACCAACTTCCTGGAGCAACCGATCAAGCGCTGCCCGCCGAAGGTGTATGCCTTCAACTTGAGCAATGACAAGACGGTCAAGACGATCGACCTGTCGGAGATTGTGAAATCCAGCTCAACTTTATTATACAAAGTTGTGGCGCGCCCCCCAACTGGGGTAACCTTTGGGCTCCCCGGGCGCGTACTCCACCTCACCC…
J_left	J_left_5	AGAP005958	1.72011	GCGCACATTAAGCCGTACCCTTGCTGGGCCTATCAGGAGGAGGGCAATTGCAACTCGCTCCAATCCGTCATCGATCTGTACGTGGATGTGAAGGTACGTTGTGTTACCGGGGCCATTGGTTTTGCGGTAGGATGAAAACGTTGCTAACGTGTTGTCTCTTTCCTTGCAGCGCATCGCGTGGGTGCTGGACTCGGGCATTACCAACTTCCTGGAGCAACCGATTAAGCGCTGCCCGCCGAAGGTGTATGCCTTCAACTTGAGCAACGACAAGACGGTCAAGACGATCGACCTGTCGGAGATTGTGAAATCCAGCTCAACTTTATTATACAAAGTTGTGGCGCGCCCCCCAACTGGGGTAACCTTTGGGCTCCCCGGGCGCGTACTCCACCTCACCCATGG…
J_left	J_left_7	AGAP005958	1.40841	GCGCACATTAAGCCGTACCCTTGCTGGGCCTATCAGGAGGAGGGCAATTGCAACTCGCTCCAATCCGTCATCGATCTGTACGTGGATGTGAAGGTACGTTGTTGTGTTACCGTGGCCACCGTGCTTTTGCGGTAGGATGAAAACATGCTAACGTGTCGTCTCTTTCCTTGCAGCGCATCGCGTGGGTGCTGGACTCGGGCATTACCAACTTCCTGGAGCAACCGATTAAGCGCTGCCCGCCGAAGGTGTATGCCTTCAACTTGAGCAATGACAAGACGGTCAAGACGATCGACCTGTCGGAGATTGTGAAATCCAGCTCAACTTTATTATACAAAGTTGTGGCGCGCCCCCCAACTGGGGTAACCTTTGGGCTCCCCGGGCGCGTACTCCACCTCACCC…
J_left	J_left_8	AGAP005958	1.16116	GCGCACATTAAGCCGTACCCTTGCTGGGCCTATCAGGAGGAGGGCAATTGCAACTCGCTCCAATCCGTCATCGATCTGTACGTGGATGTGAAGGTACGTTGTGTTACCGGGGCCATTGGTTTTGCGGTAGGATGAAAACGTTGCTAACGTGTTGTCTCTTTCCTTGCAGCGCATCGCGTGGGTGCTGGACTCGGGCATCACCAACTTCCTGGAGCAACCGATCAAGCGCTGCCCGCCGAAGGTGTATGCCTTCAACTTGAGCAACGACAAGACGGTCAAGACGATCGACCTGTCGGAGATTGTGAAATCCAGCTCAACTTTATTATACAAAGTTGTGGCGCGCCCCCCAACTGGGGTAACCTTTGGGCTCCCCGGGCGCGTACTCCACCTCACCCATGG…
J_left	J_left_9	AGAP005958	1.03501	GCGCACATTAAGCCGTACCCTTGCTGGGCCTATCAGGAGGAGGGCAATTGCAACTCGCTCCAATCCGTCATCGATCTGTACGTGGATGTGAAGGTACGTTGTTGTGTTACCGTGGCCACCGTGCTTTTGCGGTAGGATGAAAACATGCTAACGTGTCGTCTCTTTCCTTGCAGCGCATCGCGTGGGTGCTGGACTCGGGCATCACCAACTTCCTGGAGCAACCGATTAAGCGCTGCCCGCCGAAGGTGTATGCCTTCAACTTGAGCAATGACAAGACGGTCAAGACGATCGACCTGTCGGAGATTGTGAAATCCAGCTCAACTTTATTATACAAAGTTGTGGCGCGCCCCCCAACTGGGGTAACCTTTGGGCTCCCCGGGCGCGTACTCCACCTCACCC…
J_left	J_left_10	AGAP005958	0.962264	GCGCACATTAAGCCGTACCCTTGCTGGGCCTATCAGGAGGAGGGCAATTGCAACTCGCTCCAATCCGTCATCGATCTGTACGTGGATGTGAAGGTACGTTGTGTTACCGTGGCCACCGTGCTTTTGCGGTAGGATGAAAACGTGCTAACGTGTCGTCTCTTTCCTTGCAGCGCATCGCGTGGGTGCTGGACTCGGGCATCACCAACTTCCTGGAGCAACCGATCAAGCGCTGCCCGCCGAAGGTGTATGCCTTCAACTTGAGCAACGACAAGACGGTCAAGACGATCGACCTGTCGGAGATTGTGAAATCCAGCTCAACTTTATTATACAAAGTTGTGGCGCGCCCCCCAACTGGGGTAACCTTTGGGCTCCCCGGGCGCGTACTCCACCTCACCCATG…
J_left	J_left_13	AGAP005958	0.752776	GCGCACATTAAGCCGTACCCTTGCTGGGCCTATCAGGAGGAGGGCAATTGCAACTCGCTCCAATCCGTCATCGATCTGTACGTGGATGTGAAGGTACGTTGTGTTACCGGGGCCATTGGTTTTGCGGTAGGATGAAAACGTTGCTAACGTGTTGTCTCTTTCCTTGCAGCGCATCGCGTGGGTGCTGGACTCGGGCATTACCAACTTCCTGGAGCAACCGATCAAGCGCTGCCCGCCGAAGGTGTATGCCTTCAACTTGAGCAACGACAAGACGGTCAAGACGATCGACCTGTCGGAGATTGTGAAATCCAGCTCAACTTTATTATACAAAGTTGTGGCGCGCCCCCCAACTGGGGTAACCTTTGGGCTCCCCGGGCGCGTACTCCACCTCACCCATGG…
J_left	J_left_14	AGAP005958	0.744028	GCGCACATTAAGCCGTACCCTTGCTGGGCCTATCAGGAGGAGGGCAATTGCAACTCGCTCCAATCCGTCATCGATCTGTACGTGGATGTGAAGGTACGTTGTGTTACCGGGGCCATTGGTTTTGCGGTAGGATGAAAACATGCTAACGTGTCGTCTCTTTCCTTGCAGCGCATCGCGTGGGTGCTGGACTCGGGCATCACCAACTTCCTGGAGCAACCGATCAAGCGCTGCCCGCCGAAGGTGTATGCCTTCAACTTGAGCAACGACAAGACGGTCAAGACGATCGACCTGTCGGAGATTGTGAAATCCAGCTCAACTTTATTATACAAAGTTGTGGCGCGCCCCCCAACTGGGGTAACCTTTGGGCTCCCCGGGCGCGTACTCCACCTCACCCATGGG…
J_right	J_right_1	AGAP005958	32.2318	CAATGTATCTTTCCGGAGCGATCGCATGGGTGAGGTGGAGTACGCGCCCGGGGAGCCCAAAGGTTACCCCAGTTGGGGGGCGCGCCCAACTTTGTATAGAAAAGTTGGGTGCGCGGCTCCAGTATCTCGTCACTGATTACAACGAGCTCGGCCATCCGTTTGTGTAAGTATTGCGTTGGGTAAAACCTACAAAGTAAAATCACGTGCGTGAAGCTAACGATCTCCACGACTTGCAGTTACATTTCCGACGGCGATGGTGCAATCATTGTGCTGGACGTGAACAACAACAAGAGCTTCCGCGTGGTGCTACCGCGTGCCATCTCGGCTGGCTGCGGCGATTCAGATGTGCTTTACCTGCTGCTCATCCCGAAACCGAAGGGCCAGAGCCTGGTGATCTTC…
J_right	J_right_3	AGAP005958	7.037	CAATGTATCTTTCCGGAGCGATCGCATGGGTGAGGTGGAGTACGCGCCCGGGGAGCCCAAAGGTTACCCCAGTTGGGGGGCGCGCCCAACTTTGTATAGAAAAGTTGGGTGCGCGGCTCCAGTATCTCGTCACTGATTACAACGAGCTCGGCCATCCGTTTGTGTAAGTATTGTGTTGGGTAAAGCATGCAAAGTAAAATCACGTGCGTGATGCTAACGATCTCCCAACTTGCAGCTACATTTCCGATGGCGATGGTGCAATCATTGTGCTGGACGTGAACAACAACAAGAGCTTCCGCGTGGTGCTACCGCGTGCCATCTCGGCTGGCTGCGGCGATTCGGACGTGCTCTACCTGCTGCTCATCCCGAAACCGAAGGGCCAGAGCCTGGTGATCTTCA…
J_right	J_right_4	AGAP005958	2.27526	CAATGTATCTTTCCGGAGCGATCGCATGGGTGAGGTGGAGTACGCGCCCGGGGAGCCCAAAGGTTACCCCAGTTGGGGGGCGCGCCCAACTTTGTATAGAAAAGTTGGGTGCGCGGCTCCAGTATCTCGTCACTGATTACAACGAGCTCGGCCATCCGTTTGTGTAAGTATTGTGTTGGGTAAAGCATGCAAAGTAAAATCACGTGCGTGATGCTAACGATCTCCCAACTTGCAGCTACATTTCCGATGGCGATGGTGCAATCATTGTGCTGGACGTGAACAACAACAAGAGCTTCCGCGTGGTGCTACCGCGTGCCATCTCGGCTGGCTGCGGCGATTCAGATGTGCTTTACCTGCTGCTCATCCCGAAACCGAAGGGCCAGAGCCTGGTGATCTTCA…
J_right	J_right_5	AGAP005958	1.84454	CAATGTATCTTTCCGGAGCGATCGCATGGGTGAGGTGGAGTACGCGCCCGGGGAGCCCAAAGGTTACCCCAGTTGGGGGGCGCGCCCAACTTTGTATAGAAAAGTTGGGTGCGCGGCTCCAGTATCTCGTCACTGATTACAACGAGCTCGGCCATCCGTTTGTGTAAGTATTGCGTTGGGTAAAACCTACAAAGTAAAATCACGTGCGTGAAGCTAACGATCTCCACGACTTGCAGTTACATTTCCGACGGCGATGGTGCAATCATTGTGCTGGACGTGAACAACAACAAGAGCTTCCGCGTGGTGCTACCGCGTGCCATCTCGGCTGGCTGCGGCGATTCGGACGTGCTCTACCTGCTGCTCATCCCGAAACCGAAGGGCCAGAGCCTGGTGATCTTC…
J_right	J_right_15	AGAP005958	0.505667	CAATGTATCTTTCCGGAGCGATCGCATGGGTGAGGTGGAGTACGCGCCCGGGGAGCCCAAAGGTTACCCCAGTTGGGGGGCGCGCCCAACTTTGTATAGAAAAGTTGGGTGCGCGGCTCCAGTATCTCGTCACTGATTACAACGAGCTCGGCCATCCGTTTGTGTAAGTATTGTGTTGGGTAAAGCATGCAAAGTAAAATCACGTGCGTGAAGCTAACGATCTCCACGACTTGCAGTTACATTTCCGACGGCGATGGTGCAATCATTGTGCTGGACGTGAACAACAACAAGAGCTTCCGCGTGGTGCTACCGCGTGCCATCTCGGCTGGCTGCGGCGATTCAGATGTGCTTTACCTGCTGCTCATCCCGAAACCGAAGGGCCAGAGCCTGGTGATCTTC…
